# Supplementary material for: Agrichemicals and antibiotics in combination increase antibiotic resistance evolution
Source: PeerJ. 2018 Oct 12;6:e5801. doi: 10.7717/peerj.5801 (PMC6188010; doi:10.7717/peerj.5801)
Supplement: Supplemental Information 2 [file peerj-06-5801-s002.xlsx]

## Sheet: Tet+Kamba
AH201 high Tet Resistance) vs AH214 (Low Tet Resistance)
AH201can grow on tet but not Chloramphenicol
AH214 can grow on Chloramphenicol but not Tet
Kamba used at 5mM
Run 1
Starting Overnight Titres (cfu/ml):			cfu added to Comp	Starting cfu/ml	Starting Proportion
AH201	1700000000		1000000	100000	0.5		0.58ul of each ONC were added to each 10 ml tube.
AH214	1700000000		1000000	100000	0.5
Time 0	LB	AH201	AH214	ratio 201/214	ratio 214/201	Proportion 201 (out of 1)		Proportion 214
condition (Tet conc +/- Kamba)
0-	93333.3	36666.7	20000	1.83333	0.545455	0.647059		0.352941
0.05-	110000	56666.7	33333.3	1.7	0.588235	0.62963		0.37037
0.1-	100000	96666.7	16666.7	5.8	0.172414	0.852941		0.147059
0.25-	53333.3	33333.3	30000	1.11111	0.9	0.526316		0.473684
0.5-	96666.7	23333.3	30000	0.777778	1.28571	0.4375		0.5625
1-	56666.7	43333.3	33333.3	1.3	0.769231	0.565217		0.434783
0+	83333.3	43333.3	43333.3	1	1	0.5		0.5
0.05+	66666.7	30000	26666.7	1.125	0.888889	0.529412		0.470588
0.1+	63333.3	26666.7	40000	0.666667	1.5	0.4		0.6
0.25+	140000	40000	33333.3	1.2	0.833333	0.545455		0.454545
0.5+	83333.3	30000	36666.7	0.818182	1.22222	0.45		0.55
1+	106667	56666.7	33333.3	1.7	0.588235	0.62963		0.37037
Day 1 am- Following Overnight Incubation:
Treatment:	LB Titre	Tet	Cm	Overall generations
0-	800000000	nd	nd	13.0653
0.05-	6.66667e+08	nd	nd	12.5652
0.1-	2.66667e+08	nd	nd	11.3808
0.25-	300000000	nd	nd	12.4576
0.5-	400000000	nd	nd	12.0147
1-	3.66667e+08	nd	nd	12.6597
0+	200000000	nd	nd	11.2288
0.05+	800000000	nd	nd	13.5507
0.1+	500000000	nd	nd	12.9467
0.25+	1.66667e+08	nd	nd	10.2173
0.5+	9.33333e+08	nd	nd	13.4512
1+	600000000	nd	nd	12.4576
Day 1 pm - Following 1:1000 Dilution, and a growth to stat phase:
Treatment:	LB Titre	Tet	Cm
0-	1100000000	nd	nd	10.4252
0.05-	2400000000	nd	nd	11.8138
0.1-	9.33333e+08	nd	nd	11.7731
0.25-	1.43333e+09	nd	nd	12.2221
0.5-	1.76667e+09	nd	nd	12.1087
1-	7.33333e+08	nd	nd	10.9658
0+	1.03333e+09	nd	nd	12.335
0.05+	6.66667e+08	nd	nd	9.70275
0.1+	1100000000	nd	nd	11.1033
0.25+	6.66667e+08	nd	nd	11.9658
0.5+	900000000	nd	nd	9.91332
1+	8.66667e+08	nd	nd	10.4963
Day 2 am - Following 1:1000 Dilution, and a growth to stat phase:
Treatment:	LB Titre	Tet	Cm
0-	9.66667e+08	nd	nd	9.77937
0.05-	4.66667e+08	nd	nd	7.60321
0.1-	9.66667e+08	nd	nd	10.0164
0.25-	1.76667e+09	nd	nd	10.2674
0.5-	7.66667e+08	nd	nd	8.76143
1-	9.33333e+08	nd	nd	10.3137
0+	9.66667e+08	nd	nd	9.86957
0.05+	4.66667e+08	nd	nd	9.45121
0.1+	9.66667e+08	nd	nd	9.77937
0.25+	1.76667e+09	nd	nd	11.3718
0.5+	7.66667e+08	nd	nd	9.73446			201/214Ratio at the end of the experiment				Selection coefficient (number>1 means the resistant strain (201) is winning)
1+	9.33333e+08	nd	nd	10.0727			Tet conc	no K	K		Tet conc	no K	K
							0	0.666667	0.85		0	-0.210196	-0.213917	Comment: for t I used the same number as Amy (4) because we had the same number of 'rounds of growth', about 40 generations
							0.05	2	0.185185		0.05	0.0576309	-0.580597
Day 2 pm - Following 1:1000 Dilution, and a growth to stat phase:							0.1	122.222	0.4		0.1	1.16169	-0.458145
Treatment:	LB Titre	Tet	Cm				0.25	100000	0.998752		0.25	2.71777	-0.151846
0-	550000000	200000000	300000000	9.1522			0.5	70000000	1.03448e+07		0.5	4.30933	3.83837
0.05-	1.03333e+09	400000000	200000000	11.1126			1	80000000	30000000		1	4.40675	4.18852
0.1-	1.16667e+09	1100000000	9000000	10.2371		Total Generations
0.25-	1000000000	1100000000	11000	9.14475	Condition	OVERALL:	proportion of 201 (out of 1)		Proportion 214
0.5-	800000000	700000000	10	10.0272	0-	42.4221	0.4		0.6
1-	5.33333e+08	800000000	10	9.15843	0.05-	43.0949	0.666667		0.333333
0+	3.33333e+08	850000000	1000000000	8.42973	0.1-	43.4075	0.991885		0.00811542
0.05+	600000000	75000000	405000000	10.3284	0.25-	44.092	0.99999		9.9999e-06
0.1+	3.66667e+08	200000000	500000000	8.56723	0.5-	42.912	1		1.42857e-08
0.25+	6.66667e+08	400000000	400500000	8.55979	1-	43.0976	1		1.25e-08
0.5+	3.66667e+08	300000000	29	8.90165	0+	41.8631	0.459459		0.540541
1+	3.66667e+08	300000000	10	8.61786	0.05+	43.0331	0.15625		0.84375
					0.1+	42.3966	0.285714		0.714286
					0.25+	42.1147	0.499688		0.500312
					0.5+	42.0006	1		9.66667e-08
					1+	41.6445	1		3.33333e-08
						42.6732
RUN 2
Time 0	LB	AH201	AH214	ratio 201/214	ratio 214/201	proportion 201 (out of 1)		Proportion 214
condition (Tet conc +/- Kamba)
0-	46666.7	6666.67	33333.3	0.2	5	0.166667		0.833333
0.05-	66666.7	13333.3	40000	0.333333	3	0.25		0.75
0.1-	56666.7	23333.3	26666.7	0.875	1.14286	0.466667		0.533333
0.25-	40000	16666.7	43333.3	0.384615	2.6	0.277778		0.722222
0.5-	86666.7	13333.3	100000	0.133333	7.5	0.117647		0.882353
1-	83333.3	6666.67	76666.7	0.0869565	11.5	0.08		0.92
0+	90000	9500	60000	0.158333	6.31579	0.136691		0.863309
0.05+	133333	10000	133333	0.075	13.3333	0.0697674		0.930233
0.1+	140000	9500	113333	0.0838235	11.9298	0.0773406		0.922659
0.25+	50000	8500	80000	0.10625	9.41176	0.0960452		0.903955
0.5+	73333.3	5500	43333.3	0.126923	7.87879	0.112628		0.887372
1+	66666.7	8333.33	73333.3	0.113636	8.8	0.102041		0.897959
(Average)	77777.8	10944.4	68611.1	0.159514	6.26904	0.13757		0.86243
Day 1 am- Following Overnight Incubation:
Treatment:	LB Titre	Tet	Cm	Overall generations
0-	5.66667e+08	nd	nd	13.5678
0.05-	1.03333e+09	nd	nd	13.92
0.1-	700000000	nd	nd	13.5926
0.25-	3.33333e+08	nd	nd	13.0247
0.5-	200000000	nd	nd	11.1722
1-	300000000	nd	nd	11.8138
0+	400000000	nd	nd	12.1178
0.05+	6.66667e+08	nd	nd	12.2877
0.1+	5.33333e+08	nd	nd	11.8954
0.25+	4.33333e+08	nd	nd	13.0813
0.5+	1100000000	nd	nd	13.8727
1+	900000000	nd	nd	13.7207
Day 1 pm - Following 1:1000 Dilution, and a growth to stat phase:
Treatment:	LB Titre	Tet	Cm
0-	700000000	nd	nd	10.2706
0.05-	1000000000	nd	nd	9.91848
0.1-	2.66667e+08	nd	nd	8.57347
0.25-	5.33333e+08	nd	nd	10.6439
0.5-	4.33333e+08	nd	nd	11.0813
1-	800000000	nd	nd	11.3808
0+	2.66667e+08	nd	nd	9.38082
0.05+	6.66667e+08	nd	nd	9.96578
0.1+	400000000	nd	nd	9.55075
0.25+	1.13333e+09	nd	nd	11.3528
0.5+	3.66667e+08	nd	nd	8.38082
1+	200000000	nd	nd	7.79586
Day 2 am - Following 1:1000 Dilution, and a growth to stat phase:
Treatment:	LB Titre	Tet	Cm
0-	8.66667e+08	nd	nd	10.2739
0.05-	7.66667e+08	nd	nd	9.58246
0.1-	4.66667e+08	nd	nd	10.7731
0.25-	700000000	nd	nd	10.3581
0.5-	700000000	nd	nd	10.6577
1-	3.33333e+08	nd	nd	8.70275
0+	500000000	nd	nd	10.8727
0.05+	4.33333e+08	nd	nd	9.3443
0.1+	500000000	nd	nd	10.2877
0.25+	7.66667e+08	nd	nd	9.40188
0.5+	3.66667e+08	nd	nd	9.96578			201/214Ratio at the end of the experiment				Selection coefficient (number>1 means the resistant strain (201) is winning)
1+	5.66667e+08	nd	nd	11.4683			Tet conc	no K	K		Tet conc	no K	K
							0	0.857143	1.2		0	-0.486478	-0.451928	Comment: for t I used the same number as Amy (4) because we had the same number of 'rounds of growth', about 40 generations
							0.05	3.2	1.66667		0.05	-0.0557859	-0.537941
Day 2 pm - Following 1:1000 Dilution, and a growth to stat phase:							0.1	5	0.47619		0.1	0.211824	-0.825368
Treatment:	LB Titre	Tet	Cm				0.25	1800000	55.5556		0.25	3.28059	0.418612
0-	8.33333e+08	600000000	700000000	9.9092			0.5	1875000	4.66667e+06		0.5	3.07601	3.29307
0.05-	6.33333e+08	400000000	125000000	9.69015			1	50000000	30000000		1	3.80045	3.73358
0.1-	1000000000	2500000	500000	11.0653		Total Generations
0.25-	1100000000	900000000	500	10.6179	Condition	OVERALL:	proportion of 201 (out of 1)		Proportion 214
0.5-	500000000	300000000	160	9.48036	0-	44.0216	0.461538		0.538462
1-	500000000	500000000	10	10.5507	0.05-	43.1111	0.761905		0.238095
0+	5.33333e+08	600000000	500000000	10.0589	0.1-	44.0045	0.833333		0.166667
0.05+	400000000	500000000	300000000	9.85031	0.25-	44.6445	0.999999		5.55555e-07
0.1+	4.66667e+08	100000000	210000000	9.86625	0.5-	42.3915	0.999999		5.33333e-07
0.25+	2.33333e+08	100000000	1800000	8.24958	1-	42.4481	1		2e-08
0.5+	200000000	700000000	150	9.09132	0+	42.4302	0.545455		0.454545
1+	600000000	300000000	10	10.0482	0.05+	41.4481	0.625		0.375
					0.1+	41.6001	0.322581		0.677419
					0.25+	42.0855	0.982318		0.0176817
					0.5+	41.3106	1		2.14286e-07
					1+	43.0331	1		3.33333e-08
						42.7107
Run 3
Time 0	LB	AH201	AH214	ratio 201/214	ratio 214/201	proportion 201 (out of 1)		Proportion 214
condition (Tet conc +/- Kamba)
0-	133333	76666.7	96666.7	0.793103	1.26087	0.442308		0.557692
0.05-	103333	50000	36666.7	1.36364	0.733333	0.576923		0.423077
0.1-	116667	33333.3	63333.3	0.526316	1.9	0.344828		0.655172
0.25-	46673.7	30000	86666.7	0.346154	2.88889	0.257143		0.742857
0.5-	133333	63333.3	103333	0.612903	1.63158	0.38		0.62
1-	120000	93333.3	90000	1.03704	0.964286	0.509091		0.490909
0+	116667	50000	90000	0.555556	1.8	0.357143		0.642857
0.05+	130000	63333.3	93333.3	0.678571	1.47368	0.404255		0.595745
0.1+	145000	46666.7	63333.3	0.736842	1.35714	0.424242		0.575758
0.25+	165000	76666.7	66666.7	1.15	0.869565	0.534884		0.465116
0.5+	125000	66666.7	86666.7	0.769231	1.3	0.434783		0.565217
1+	160000	70000	70000	1	1	0.5		0.5
Day 1 am- Following Overnight Incubation:
Treatment:	LB Titre	Tet	Cm	Overall generations
0-	4.33333e+08	nd	nd	11.6662
0.05-	1000000000	nd	nd	13.2404
0.1-	3.33333e+09	nd	nd	14.8023
0.25-	7.33333e+08	nd	nd	13.9396
0.5-	900000000	nd	nd	12.7207
1-	6.33333e+08	nd	nd	12.3657
0+	5.33333e+08	nd	nd	12.1584
0.05+	8.66667e+08	nd	nd	12.7027
0.1+	7.66667e+08	nd	nd	12.3683
0.25+	5.66667e+08	nd	nd	11.7458
0.5+	3.66667e+08	nd	nd	11.5183
1+	300000000	nd	nd	10.8727
Day 1 pm - Following 1:1000 Dilution, and a growth to stat phase:
Treatment:	LB Titre	Tet	Cm
0-	8.66667e+08	nd	nd	10.9658
0.05-	800000000	nd	nd	9.64386
0.1-	8.66667e+08	nd	nd	8.02237
0.25-	800000000	nd	nd	10.0913
0.5-	2e+08	nd	nd	7.79586
1-	9.66667e+08	nd	nd	10.5758
0+	2.33333e+08	nd	nd	8.77314
0.05+	6.33333e+08	nd	nd	9.51327
0.1+	300000000	nd	nd	8.61215
0.25+	2.66667e+08	nd	nd	8.87832
0.5+	600000000	nd	nd	10.6763
1+	450000000	nd	nd	10.5507
Day 2 am - Following 1:1000 Dilution, and a growth to stat phase:
Treatment:	LB Titre	Tet	Cm
0-	7.66667e+08	nd	nd	9.78891
0.05-	1100000000	nd	nd	10.4252
0.1-	5.66667e+08	nd	nd	9.35281
0.25-	8.66667e+08	nd	nd	10.0813
0.5-	7.33333e+08	nd	nd	11.8403
1-	8.33333e+08	nd	nd	9.75166
0+	6.33333e+08	nd	nd	11.4064			201/214Ratio at the end of the experiment				Selection coefficient (number>1 means the resistant strain (201) is winning)
0.05+	3.66667e+08	nd	nd	9.17729			Tet conc	no K	K		Tet conc	no K	K
0.1+	6.33333e+08	nd	nd	11.0438			0	0.483333	0.666667		0	-0.3857	-0.358771	Comment: for t I used the same number as Amy (4) because we had the same number of 'rounds of growth', about 40 generations
0.25+	400000000	nd	nd	10.5507			0.05	3	1.8		0.05	0.137141	-0.0794805
0.5+	350000000	nd	nd	9.18818			0.1	500	2		0.1	1.28747	-0.0410758
1+	3.33333e+08	nd	nd	9.53282			0.25	1.66667e+06	4.34783		0.25	3.24205	0.210993
							0.5	40000000	10000		0.5	4.1342	2.09436
							1	60000000	3.33333e+06		1	4.30868	3.58158
Day 2 pm - Following 1:1000 Dilution, and a growth to stat phase:						Total Generations
Treatment:	LB Titre	Tet	Cm		Condition	OVERALL:	proportion of 201 (out of 1)		proportion 214
0-	6.33333e+08	145000000	300000000	9.69015	0-	42.1111	0.325843		0.674157
0.05-	600000000	600000000	200000000	9.09132	0.05-	42.4008	0.75		0.25
0.1-	6.33333e+08	400000000	800000	10.1262	0.1-	42.3037	0.998004		0.00199601
0.25-	7.66667e+08	500000000	300	9.78891	0.25-	43.9011	0.999999		6e-07
0.5-	3.66667e+08	400000000	10	8.96578	0.5-	41.3226	1		2.5e-08
1-	6.33333e+08	600000000	10	9.56986	1-	42.2631	1		1.66667e-08
0+	400000000	200000000	300000000	9.30282	0+	41.6407	0.4		0.6
0.05+	300000000	900000000	500000000	9.67628	0.05+	41.0696	0.642857		0.357143
0.1+	500000000	200000000	100000000	9.62475	0.1+	41.649	0.666667		0.333333
0.25+	4.33333e+08	500000000	1.15e+08	10.0813	0.25+	41.2561	0.813008		0.186992
0.5+	400000000	400000000	40000	10.1584	0.5+	41.5412	0.9999		9.999e-05
1+	2.66667e+08	400000000	120	9.64386	1+	40.6001	1		3e-07
						41.8383
Summary of 3 runs:
							Final Ratio 201/214			SEM ratio
Treatment:	Average # generations	Average Proportion 201 (out of 1) at the end	SEM proportion				Tet conc	No K	K	No K	K
0-	42.8516	0.395794	0.0392284				0	0.669048	0.905556	0.107916	0.156446
0.05-	42.8689	0.72619	0.0299597				0.05	2.73333	1.21728	0.371184	0.517483
0.1-	43.2386	0.941074	0.0538993				0.1	209.074	0.95873	149.347	0.521099
0.25-	44.2125	0.999996	3.14073e-06				0.25	1.18889e+06	20.3007	545803	17.6539
0.5-	42.2087	1	1.71258e-07				0.5	3.72917e+07	5.00716e+06	1.97126e+07	2.98826e+06
1-	42.6029	1	2.16951e-09				1	6.33333e+07	2.11111e+07	8.81917e+06	8.88889e+06
0+	41.978	0.468305	0.0422214
0.05+	41.8502	0.474702	0.15931				Selection Coefficient			SEM
0.1+	41.8819	0.424987	0.121307				Tet conc	No K	K	No K	K
0.25+	41.8188	0.765005	0.141376				0	-0.360791	-0.341539	0.0807222	0.0692462
0.5+	41.6175	0.999967	3.32782e-05				0.05	0.0463288	-0.399339	0.0559793	0.160403
1+	41.7592	1	8.88889e-08				0.1	0.886998	-0.44153	0.339534	0.226558
							0.25	3.08014	0.159253	0.181526	0.166697
							0.5	3.83985	3.07527	0.385249	0.515097
							1	4.17196	3.83456	0.187899	0.182338
							Data reported in MS

## Sheet: Tet+Rup
AH201 high Tet Resistance) vs AH214 (Low Tet Resistance)
AH201can grow on tet but not Chloramphenicol
AH214 can grow on Chloramphenicol but not Tet
Rup used at 311 ppm ae (11.6 ul/10ml)
Run 1
Starting Overnight Titres (cfu/ml):			cfu added to Comp	Starting cfu/ml	Starting Proportion
AH201	1700000000		1000000	100000	0.5
AH214	1700000000		1000000	100000	0.5
Reality	LB	AH201	AH214	ratio 201/214	ratio 214/201	Proportion 201 (out of 1)	Proportion 214	Resistance frequency of AH201
condition (Tet conc +/- Rupamba)
0-	176667	45000	90000	0.5	2	0.333333	0.666667	0.254717
0.005-	170000	283333	393333	0.720339	1.38824	0.418719	0.581281	1.66667
0.01-	480000	63333.3	390000	0.162393	6.15789	0.139706	0.860294	0.131944
0.025-	180000	43333.3	133333	0.325	3.07692	0.245283	0.754717	0.240741
0.05-	143333	46666.7	153333	0.304348	3.28571	0.233333	0.766667	0.325581
0.075-	170000	20000	103333	0.193548	5.16667	0.162162	0.837838	0.117647
0+	156667	130000	80000	1.625	0.615385	0.619048	0.380952	0.829787
0.005+	193333	86666.7	110000	0.787879	1.26923	0.440678	0.559322	0.448276
0.01+	96666.7	33333.3	76666.7	0.434783	2.3	0.30303	0.69697	0.344828
0.025+	83333.3	23333.3	66666.7	0.35	2.85714	0.259259	0.740741	0.28
0.05+	133333	53333.3	50000	1.06667	0.9375	0.516129	0.483871	0.4
0.075+	196667	36666.7	96666.7	0.37931	2.63636	0.275	0.725	0.186441
Day 1 am- Following Overnight Incubation:
Treatment:	LB Titre	Tet	Cm	Overall generations
0-	1300000000	nd	nd	12.8452
0.005-	9.33333e+08	nd	nd	12.4226
0.01-	4.33333e+08	nd	nd	9.81823
0.025-	1.33333e+09	nd	nd	12.8548
0.05-	9.66667e+08	nd	nd	12.7194
0.075-	1.03333e+09	nd	nd	12.5695
0+	1000000000	nd	nd	12.64
0.005+	7.66667e+08	nd	nd	11.9533
0.01+	7.33333e+08	nd	nd	12.8892
0.025+	3.33333e+08	nd	nd	11.9658
0.05+	3.33333e+08	nd	nd	11.2877
0.075+	66666669	nd	nd	8.40507
Day 1 pm - Following 1:1000 Dilution, and a growth to stat phase:
Treatment:	LB Titre	Tet	Cm
0-	300000000	nd	nd	7.85031
0.005-	4.66667e+08	nd	nd	8.96578
0.01-	600000000	nd	nd	10.4353
0.025-	700000000	nd	nd	9.03617
0.05-	6.33333e+08	nd	nd	9.35573
0.075-	8.33333e+08	nd	nd	9.65544
0+	7.33333e+08	nd	nd	9.51833
0.005+	5.33333e+08	nd	nd	9.44222
0.01+	4.33333e+08	nd	nd	9.20679
0.025+	5.66667e+08	nd	nd	10.7313
0.05+	4.33333e+08	nd	nd	10.3443
0.075+	500000000	nd	nd	12.8727
Day 2 am - Following 1:1000 Dilution, and a growth to stat phase:
Treatment:	LB Titre	Tet	Cm
0-	5.66667e+08	nd	nd	10.8833
0.005-	550000000	nd	nd	10.2028
0.01-	6.66667e+08	nd	nd	10.1178
0.025-	7.66667e+08	nd	nd	10.097
0.05-	4.66667e+08	nd	nd	9.52521
0.075-	8.66667e+08	nd	nd	10.0224
0+	700000000	nd	nd	9.89867
0.005+	600000000	nd	nd	10.1357
0.01+	6.33333e+08	nd	nd	10.5133
0.025+	1.23333e+09	nd	nd	11.0878
0.05+	7.33333e+08	nd	nd	10.7248			201/214Ratio at the end of the experiment				Selection coefficient (number>1 means the resistant strain (201) is winning)
0.075+	400000000	nd	nd	9.64386			Tet conc	no Rup	Rup		Tet conc	no Rup	Rup
							0	0.222222	1.42857		0	-0.650672	-0.0307245	Comment: for t I used the same number as Amy (4) because we had the same number of 'rounds of growth', about 40 generations
							0.005	0.533333	1.22222		0.005	-0.374791	-0.154693
Day 2 pm - Following 1:1000 Dilution, and a growth to stat phase:							0.01	1.38889	1.11111		0.01	-0.409928	-0.27214
Treatment:	LB Titre	Tet	Cm				0.025	1.05556	0.611111		0.025	-0.337819	-0.460601
0-	9.66667e+08	2.66667e+08	1200000000	10.7363			0.05	1.16667	96.2963		0.05	-0.325284	0.976508
0.005-	9.66667e+08	2.66667e+08	500000000	10.7794			0.075	8.66667	366667		0.075	0.0850815	2.88031
0.01-	1.46667e+09	8.33333e+08	600000000	11.1033		Total Generations
0.025-	1.16667e+09	6.33333e+08	600000000	10.5715	Condition	OVERALL:	proportion of 201 (out of 1)	Proportion 214	Resistance frequency AH201	Resistance frequency 201 per generation (end of experiment)	frequency 214 end
0.05-	700000000	700000000	600000000	10.5507	0-	42.3151	0.181818	0.818182	0.275862	0.00651923	1.24138
0.075-	8.66667e+08	8.66667e+08	100000000	9.96578	0.005-	42.3706	0.347826	0.652174	0.275862	0.00651069	0.517241
0+	9.33333e+08	100000000	70000000	10.3808	0.01-	41.4746	0.581395	0.418605	0.568182	0.0136995	0.409091
0.005+	9.33333e+08	3.66667e+08	300000000	10.6032	0.025-	42.5595	0.513514	0.486486	0.542857	0.0127553	0.514286
0.01+	1.06667e+09	6.66667e+08	600000000	10.7179	0.05-	42.1511	0.538462	0.461538	1	0.0237242	0.857143
0.025+	1400000000	3.66667e+08	600000000	10.1486	0.075-	42.2131	0.896552	0.103448	1	0.0236893	0.115385
0.05+	1.23333e+09	8.66667e+08	9000000	10.7158	0+	42.4378	0.588235	0.411765	0.107143	0.0025247	0.075
0.075+	1.16667e+09	7.33333e+08	2000	11.5101	0.005+	42.1344	0.55	0.45	0.392857	0.0093239	0.321429
					0.01+	43.3271	0.526316	0.473684	0.625	0.0144252	0.5625
					0.025+	43.9335	0.37931	0.62069	0.261905	0.00596139	0.428571
					0.05+	43.0726	0.989722	0.0102779	0.702703	0.0163144	0.0072973
					0.075+	42.4317	0.999997	2.72727e-06	0.628571	0.0148137	1.71429e-06
						42.5351
RUN 2
Reality	LB	AH201	AH214	ratio 201/214	ratio 214/201	proportion 201 (out of 1)	Proportion 214
condition (Tet conc +/- Rupamba)
0-	133333	86666.7	63333.3	1.36842	0.730769	0.577778	0.422222
0.005-	183333	133333	90000	1.48148	0.675	0.597015	0.402985
0.01-	110000	426667	56666.7	7.52941	0.132813	0.882759	0.117241
0.025-	170000	2150000	96666.7	22.2414	0.0449612	0.956973	0.0430267
0.05-	136667	120000	66666.7	1.8	0.555556	0.642857	0.357143
0.075-	163333	123333	60000	2.05556	0.486486	0.672727	0.327273
0+	100000	70000	73333.3	0.954545	1.04762	0.488372	0.511628
0.005+	113333	90000	63333.3	1.42105	0.703704	0.586957	0.413043
0.01+	110000	66666.7	63333.3	1.05263	0.95	0.512821	0.487179
0.025+	176667	76666.7	36666.7	2.09091	0.478261	0.676471	0.323529
0.05+	113333	60000	53333.3	1.125	0.888889	0.529412	0.470588
0.075+	143333	83333.3	83333.3	1	1	0.5	0.5
Day 1 am- Following Overnight Incubation:
Treatment:	LB Titre	Tet	Cm	Overall generations
0-	1200000000	nd	nd	13.1357
0.005-	9.33333e+08	nd	nd	12.3137
0.01-	1.53333e+09	nd	nd	13.7669
0.025-	500000000	nd	nd	11.5222
0.05-	8.66667e+08	nd	nd	12.6306
0.075-	1.13333e+09	nd	nd	12.7605
0+	4.86667e+09	nd	nd	15.5706
0.005+	400000000	nd	nd	11.7852
0.01+	5.33333e+08	nd	nd	12.2433
0.025+	400000000	nd	nd	11.1448
0.05+	4.66667e+08	nd	nd	12.0076
0.075+	700000000	nd	nd	12.2538
Day 1 pm - Following 1:1000 Dilution, and a growth to stat phase:
Treatment:	LB Titre	Tet	Cm
0-	6.33333e+08	nd	nd	9.04379
0.005-	5.66667e+08	nd	nd	9.24589
0.01-	400000000	nd	nd	8.02718
0.025-	4.33333e+08	nd	nd	9.75933
0.05-	900000000	nd	nd	10.0202
0.075-	1.03333e+09	nd	nd	9.83252
0+	8.33333e+08	nd	nd	7.41982
0.005+	4.66667e+08	nd	nd	10.1882
0.01+	7.33333e+08	nd	nd	10.4252
0.025+	6.66667e+08	nd	nd	10.7027
0.05+	500000000	nd	nd	10.0653
0.075+	6.66667e+08	nd	nd	9.89539
Day 2 am - Following 1:1000 Dilution, and a growth to stat phase:
Treatment:	LB Titre	Tet	Cm
0-	3.33333e+08	nd	nd	9.03978
0.005-	8.66667e+08	nd	nd	10.5788
0.01-	7.66667e+08	nd	nd	10.9044
0.025-	2.66667e+08	nd	nd	9.26534
0.05-	1.03333e+09	nd	nd	10.1651
0.075-	9.33333e+08	nd	nd	9.81894
0+	300000000	nd	nd	8.49185
0.005+	6.33333e+08	nd	nd	10.4064
0.01+	2500000000	nd	nd	11.7352
0.025+	2.66667e+08	nd	nd	8.64386
0.05+	100000000	nd	nd	7.64386			201/214Ratio at the end of the experiment				Selection coefficient (number>1 means the resistant strain (201) is winning)
0.075+	1.66667e+08	nd	nd	7.96578			Tet conc	no Rup	Rup		Tet conc	no Rup	Rup
							0	0.777778	10.3333		0	-0.19997	0.404674	Comment: for t I used the same number as Amy (4) because we had the same number of 'rounds of growth', about 40 generations
							0.005	0.533333	26.6667		0.005	-0.286105	0.687652
Day 2 pm - Following 1:1000 Dilution, and a growth to stat phase:							0.01	1.4	8.09524		0.01	0.0529422	0.355862
Treatment:	LB Titre	Tet	Cm				0.025	0.555556	222.222		0.025	-0.157942	1.2532
0-	8.66667e+08	4.66667e+08	600000000	11.3443			0.05	1.16667	90000000		0.05	-0.0719205	4.41983
0.005-	1100000000	2.66667e+08	500000000	10.3097			0.075	6.66667	27777.8		0.075	0.375176	2.38471
0.01-	8.33333e+08	700000000	500000000	10.0861		Total Generations
0.025-	9.66667e+08	3.33333e+08	600000000	11.8238	Condition	OVERALL:	proportion 201 (out of 1)	proportion 214		resistance frequency	Resistance frequency/generation	frequency 214 end
0.05-	1.16667e+09	4.66667e+08	400000000	10.1409	0-	42.5636	0.4375	0.5625		0.538462	0.0126508	0.692308
0.075-	300000000	900000000	135000000	8.32835	0.005-	42.4481	0.347826	0.652174		0.242424	0.00571107	0.454545
0+	1.06667e+09	1.03333e+09	100000000	11.7959	0.01-	42.7845	0.583333	0.416667		0.84	0.0196333	0.6
0.005+	900000000	800000000	30000000	10.4727	0.025-	42.3706	0.357143	0.642857		0.344828	0.00813837	0.62069
0.01+	6.66667e+08	5.66667e+08	70000000	8.05889	0.05-	42.9568	0.538462	0.461538		0.4	0.00931168	0.342857
0.025+	6.33333e+08	6.66667e+08	3000000	11.2137	0.075-	40.7403	0.869565	0.130435		3	0.0736372	0.45
0.05+	7.33333e+08	900000000	10	12.8403	0+	43.2782	0.911765	0.0882353		0.96875	0.0223843	0.09375
0.075+	500000000	8.33333e+08	30000	11.5507	0.005+	42.8525	0.963855	0.0361446		0.888889	0.020743	0.0333333
					0.01+	42.4626	0.890052	0.109948		0.85	0.0200176	0.105
					0.025+	41.7051	0.99552	0.00447984		1.05263	0.0252399	0.00473684
					0.05+	42.557	1	1.11111e-08		1.22727	0.0288383	1.36364e-08
					0.075+	41.6657	0.999964	3.59987e-05		1.66667	0.0400009	6e-05
						42.3654
Run 3
Reality	LB	AH201	AH214	ratio 201/214	ratio 214/201	proportion 201 (out of 1)	Proportion 214
condition (Tet conc +/- Rupamba)
0-	163333	100000	103333	0.967742	1.03333	0.491803	0.508197
0.005-	200000	103333	83333.3	1.24	0.806452	0.553571	0.446429
0.01-	136667	116667	100000	1.16667	0.857143	0.538462	0.461538
0.025-	166667	100000	76666.7	1.30435	0.766667	0.566038	0.433962
0.05-	223333	100000	80000	1.25	0.8	0.555556	0.444444
0.075-	240000	113333	86666.7	1.30769	0.764706	0.566667	0.433333
0+	233333	133333	73333.3	1.81818	0.55	0.645161	0.354839
0.005+	220000	76666.7	100000	0.766667	1.30435	0.433962	0.566038
0.01+	176667	93333.3	96666.7	0.965517	1.03571	0.491228	0.508772
0.025+	193333	66666.7	106667	0.625	1.6	0.384615	0.615385
0.05+	220000	146667	120000	1.22222	0.818182	0.55	0.45
0.075+	230000	123333	120000	1.02778	0.972973	0.506849	0.493151
Day 1 am- Following Overnight Incubation:
Treatment:	LB Titre	Tet	Cm	Overall generations
0-	800000000	nd	nd	12.258
0.005-	1.16667e+09	nd	nd	12.5101
0.01-	1.56667e+09	nd	nd	13.4847
0.025-	2.33333e+08	nd	nd	10.4512
0.05-	6.66667e+08	nd	nd	11.5436
0.075-	1.23333e+09	nd	nd	12.3272
0+	900000000	nd	nd	11.9133
0.005+	6.66667e+08	nd	nd	11.5652
0.01+	1.66667e+08	nd	nd	9.88172
0.025+	600000000	nd	nd	11.5997
0.05+	3.66667e+08	nd	nd	10.7027
0.075+	5.66667e+08	nd	nd	11.2667
Day 1 pm - Following 1:1000 Dilution, and a growth to stat phase:
Treatment:	LB Titre	Tet	Cm
0-	8.33333e+08	nd	nd	10.0247
0.005-	1.23333e+09	nd	nd	10.046
0.01-	3.33333e+08	nd	nd	7.73312
0.025-	800000000	nd	nd	11.7434
0.05-	1000000000	nd	nd	10.5507
0.075-	700000000	nd	nd	9.14865
0+	1.06667e+09	nd	nd	10.2109
0.005+	7.66667e+08	nd	nd	10.1674
0.01+	8.33333e+08	nd	nd	12.2877
0.025+	7.66667e+08	nd	nd	10.3194
0.05+	800000000	nd	nd	11.0913
0.075+	7.66667e+08	nd	nd	10.4019
Day 2 am - Following 1:1000 Dilution, and a growth to stat phase:
Treatment:	LB Titre	Tet	Cm
0-	7.66667e+08	nd	nd	9.84549
0.005-	7.66667e+08	nd	nd	9.27989
0.01-	600000000	nd	nd	10.8138
0.025-	500000000	nd	nd	9.28771
0.05-	6.33333e+08	nd	nd	9.30682
0.075-	8.66667e+08	nd	nd	10.2739
0+	4.33333e+08	nd	nd	8.66622			201/214Ratio at the end of the experiment				Selection coefficient (number>1 means the resistant strain (201) is winning)
0.005+	6.33333e+08	nd	nd	9.69015			Tet conc	no Rup	Rup		Tet conc	no Rup	Rup
0.01+	400000000	nd	nd	8.90689			0	0.777778	1.75		0	-0.240248	0.0303402	Comment: for t I used the same number as Amy (4) because we had the same number of 'rounds of growth', about 40 generations
0.025+	4.33333e+08	nd	nd	9.14266			0.005	2.66667	5		0.005	0.0973662	0.19366
0.05+	800000000	nd	nd	9.96578			0.01	0.916667	3.83333		0.01	-0.176513	0.158222
0.075+	6.33333e+08	nd	nd	9.69015			0.025	0.8	0.666667		0.025	-0.19806	-0.340244
							0.05	3.16667	6825.4		0.05	0.141223	2.05764
							0.075	7.61905	120000		0.075	0.365667	2.75393
Day 2 pm - Following 1:1000 Dilution, and a growth to stat phase:						Total Generations
Treatment:	LB Titre	Tet	Cm		Condition	OVERALL:	proportion of 201 (out of 1)	proportion 214		resistance frequency	Resistance frequency/generation	frequency 214 end
0-	1.26667e+09	4.66667e+08	600000000	10.6901	0-	42.8183	0.4375	0.5625		0.368421	0.00860429	0.473684
0.005-	1100000000	5.33333e+08	200000000	10.4866	0.005-	42.3226	0.727273	0.272727		0.484848	0.011456	0.181818
0.01-	1200000000	3.66667e+08	400000000	10.9658	0.01-	42.9974	0.478261	0.521739		0.305556	0.00710637	0.333333
0.025-	7.33333e+08	400000000	500000000	10.5183	0.025-	42.0006	0.444444	0.555556		0.545455	0.0129868	0.681818
0.05-	900000000	6.33333e+08	200000000	10.4727	0.05-	41.8739	0.76	0.24		0.703704	0.0168053	0.222222
0.075-	1.03333e+09	5.33333e+08	70000000	10.2195	0.075-	41.9693	0.883978	0.116022		0.516129	0.0122978	0.0677419
0+	6.33333e+08	700000000	400000000	10.5133	0+	41.3037	0.636364	0.363636		1.10526	0.0267594	0.631579
0.005+	1.36667e+09	1000000000	200000000	11.0754	0.005+	42.4982	0.833333	0.166667		0.731707	0.0172174	0.146341
0.01+	9.66667e+08	7.66667e+08	200000000	11.2388	0.01+	42.3151	0.793103	0.206897		0.793103	0.0187428	0.206897
0.025+	1.06667e+09	3.33333e+08	500000000	11.2653	0.025+	42.3271	0.4	0.6		0.3125	0.00738298	0.46875
0.05+	2100000000	1.43333e+09	210000	11.3581	0.05+	43.118	0.999854	0.00014649		0.68254	0.0158296	0.0001
0.075+	9.33333e+08	1200000000	10000	10.5252	0.075+	41.8839	0.999992	8.33326e-06		1.28571	0.0306971	1.07143e-05
						42.2857
Summary of 3 runs:
							Final Ratio 201/214			SEM ratio			Resistance frequency end				non-resistance frequency end
Treatment:	Average # generations	Average Prop201 end	SEM proportion	Average Prop 214 end	SEM		Tet conc	No Rup	Rup	No Rup	Rup		Tet conc	No Rup	Rup		Tet conc	No Rup	Rup
0-	42.5657	0.352273	0.0852273	1.17648e-05	0.0852273		0	0.592593	4.50397	0.185185	2.91616		0	0.394248	0.727052		0	0.802457	0.266776
0.005-	42.3804	0.474308	0.126482	0	0.126482		0.005	1.24444	10.963	0.711111	7.92722		0.005	0.334378	0.671151		0.005	0.384535	0.167034
0.01-	42.4188	0.547663	0.0347057	0	0.0347057		0.01	1.23519	4.34656	0.159292	2.03241		0.01	0.571246	0.756034		0.01	0.447475	0.291466
0.025-	42.3102	0.438367	0.0452425	0	0.0452425		0.025	0.803704	74.5	0.144349	73.8611		0.025	0.477713	0.542345		0.025	0.605598	0.300686
0.05-	42.3273	0.612308	0.0738462	0	0.0738462		0.05	1.83333	3.00023e+07	0.666667	2.99988e+07		0.05	0.701235	0.870838		0.05	0.474074	0.00246577
0.075-	41.6409	0.883365	0.00779636	0	0.00779636		0.075	7.65079	171481	0.577568	101159		0.075	1.50538	1.19365		0.075	0.211042	2.41429e-05
0+	42.3399	0.712121	0.100784	0	0.100784
0.005+	42.4951	0.782396	0.122154	0	0.122154		Selection Coefficient			SEM			Resistance frequency/generation end				non-resistance frequency per gen end
0.01+	42.7016	0.736491	0.10875	0	0.10875		Tet conc	No Rup	Rup	No Rup	Rup		Tet conc	No Rup	Rup		Tet conc	No Rup	Rup
0.025+	42.6552	0.59161	0.202043	0.296296	0.202043		0	-0.36363	0.134763	0.143991	0.136102		0	0.00925809	0.0172228		0	0.0188522	0.00630082
0.05+	42.9159	0.996525	0.00340181	0.622222	0.00340181		0.005	-0.187843	0.242207	0.144885	0.244373		0.005	0.0078926	0.0157614		0.005	0.00907341	0.00393068
0.075+	41.9938	0.999984	1.02843e-05	0.617593	1.02843e-05		0.01	-0.177833	0.0806477	0.133621	0.185391		0.01	0.0134797	0.0177285		0.01	0.010549	0.00682563
							0.025	-0.231273	0.150786	0.054517	0.552302		0.025	0.0112935	0.0128614		0.025	0.0143133	0.00704922
							0.05	-0.0853271	2.48466	0.134836	1.01667		0.05	0.0166137	0.0203274		0.05	0.0112002	5.74559e-05
							0.075	0.275308	2.67298	0.095153	0.148681		0.075	0.0365414	0.0285039		0.075	0.00506815	5.74915e-07
							Data reported in MS
