# Supplementary material for: Agrichemicals and antibiotics in combination increase antibiotic resistance evolution
Source: PeerJ. 2018 Oct 12;6:e5801. doi: 10.7717/peerj.5801 (PMC6188010; doi:10.7717/peerj.5801)
Supplement: Supplemental Information 3 [file peerj-06-5801-s003.xlsx]

## Sheet: Kamba+Strep
AH204 (Strep resistant) vs AH211 (Strep Susceptible)
AH204 can grow on Nalidixic acid but not Chloramphenicol
AH211 can grow on Chloramphenicol but not Nalidixic acid
TEST 1:									TEST 2:									TEST 3:
Starting Overnight Titres (cfu/ml):			Amt added to Comp	Starting cfu/ml	Starting Proportion				Starting Overnight Titres (cfu/ml):			Amt added to Comp	Starting cfu/ml	Starting Proportion				Starting Overnight Titres (cfu/ml):			Amt added to Comp	Starting cfu/ml	Starting Proportion
AH204	500000000		25000	2500	0.375				AH204	7.33333e+08		36666.7	3666.67	0.628571				AH204	700000000		35000	3500	0.7
AH211	8.33333e+08		41666.7	4166.67	0.625				AH211	4.33333e+08		21666.7	2166.67	0.371429				AH211	300000000		15000	1500	0.3
Day 1 - Following Overnight Incubation:						GENERATIONS:			Day 1 - Following Overnight Incubation:						GENERATIONS:			Day 1 - Following Overnight Incubation:						GENERATIONS:
Treatment:	LB Titre	Nx	Cm	Proportion AH204	Proportion AH211	AH204	AH211		Treatment:	LB Titre	Nx	Cm	Proportion AH204	Proportion AH211	AH204	AH211		Treatment:	LB Titre	Nx	Cm	Proportion AH204	Proportion AH211	AH204	AH211
LB	600000000	2.51667e+08	400000000	0.386189	0.613811	16.6192	16.5507		LB	500000000	134000000	600000000	0.182561	0.817439	15.1574	18.0791		LB	3.66667e+08	375000000	4.33333e+08	0.463918	0.536082	16.7092	18.1402
Kamba 7.5mM	1.66667e+08	140000000	1.58333e+08	0.469274	0.530726	15.7731	15.2137		Kamba 7.5mM	185000000	70000000	184000000	0.275591	0.724409	14.2206	16.3739		Kamba 7.5mM	2.48333e+08	242000000	200000000	0.547511	0.452489	16.0773	17.0247
Kamba 1mM	600000000	190000000	2.11667e+08	0.473029	0.526971	16.2137	15.6325		Kamba 1mM	500000000	142000000	2.33333e+08	0.37833	0.62167	15.2411	16.7166		Kamba 1mM	700000000	100000000	300000000	0.25	0.75	14.8023	17.6096
Kamba 0.1mM	900000000	5.66667e+08	6.33333e+08	0.472222	0.527778	17.7902	17.2137		Kamba 0.1mM	7.66667e+08	115000000	4.33333e+08	0.209726	0.790274	14.9368	17.6096		Kamba 0.1mM	4.33333e+08	107500000	500000000	0.176955	0.823045	14.9066	18.3466
Strep 0.25µg/ml	700000000	116000000	5.66667e+08	0.169922	0.830078	15.5018	17.0532		Strep 0.25µg/ml	6.66667e+08	126000000	500000000	0.201278	0.798722	15.0686	17.8161		Strep 0.25µg/ml	400000000	126000000	300000000	0.295775	0.704225	15.1357	17.6096
Strep 0.25 + K7.5	3.66667e+08	4.66667e+08	820000	0.998246	0.00175406	17.5101	7.62059		Strep 0.25 + K7.5	3.16667e+08	3.21667e+08	1.93333e+06	0.994026	0.00597445	16.4207	9.8014		Strep 0.25 + K7.5	260000000	136000000	1340000	0.990243	0.00975681	15.2459	9.80305
Strep 0.25+ K1	4.66667e+08	3.66667e+08	1.83333e+08	0.666667	0.333333	17.1622	15.4252		Strep 0.25+ K1	500000000	3.21667e+08	2.88333e+08	0.527322	0.472678	16.4207	17.0219		Strep 0.25+ K1	3.66667e+08	2.98333e+08	1.23333e+08	0.70751	0.29249	16.3792	16.3272
Strep 0.25 + K0.1	8.66667e+08	2.41667e+08	3.66667e+08	0.39726	0.60274	16.5607	16.4252		Strep 0.25 + K0.1	300000000	100000000	300000000	0.25	0.75	14.7352	17.0791		Strep 0.25 + K0.1	4.33333e+08	120000000	500000000	0.193548	0.806452	15.0653	18.3466
Day 2 - Following 1:1000 Dilution, and a second overnight incubation:						GENERATIONS:			Day 2 - Following 1:1000 Dilution, and a second overnight incubation:						GENERATIONS:			Day 2 - Following 1:1000 Dilution, and a second overnight incubation:						GENERATIONS:
Treatment:	LB Titre	Nx	Cm	Proportion AH204	Proportion AH211	AH204	AH211		Treatment:	LB Titre	Nx	Cm	Proportion AH204	Proportion AH211	AH204	AH211		Treatment:	LB Titre	Nx	Cm	Proportion AH204	Proportion AH211	AH204	AH211
LB	5.66667e+08	140000000	3.33333e+08	0.295775	0.704225	9.1197	9.70275		LB	4.33333e+08	127500000	4.33333e+08	0.22734	0.77266	9.89405	9.4963		LB	5.33333e+08	160000000	6.66667e+08	0.193548	0.806452	8.73697	10.5873
Kamba 7.5mM	2.33333e+08	135000000	164000000	0.451505	0.548495	9.91332	10.0165		Kamba 7.5mM	700000000	120000000	2.26667e+08	0.346154	0.653846	10.7434	10.2667		Kamba 7.5mM	3.66667e+08	1.78333e+08	190000000	0.484163	0.515837	9.52535	9.89178
Kamba 1mM	4.33333e+08	164000000	1.66667e+08	0.495968	0.504032	9.75348	9.62096		Kamba 1mM	3.66667e+08	120000000	2.81667e+08	0.298755	0.701245	9.72293	10.2374		Kamba 1mM	500000000	142000000	4.33333e+08	0.246813	0.753187	10.4717	10.4963
Kamba 0.1mM	7.33333e+08	400000000	258000000	0.607903	0.392097	9.46328	8.67019		Kamba 0.1mM	7.33333e+08	186000000	5.66667e+08	0.247121	0.752879	10.6595	10.3528		Kamba 0.1mM	600000000	140000000	600000000	0.189189	0.810811	10.3469	10.2288
Strep 0.25µg/ml	500000000	400000000	1.36667e+08	0.745342	0.254658	11.7517	7.91395		Strep 0.25µg/ml	5.66667e+08	1.26667e+08	3.33333e+08	0.275362	0.724638	9.9734	9.38082		Strep 0.25µg/ml	222000000	200000000	280000000	0.416667	0.583333	10.6324	9.86625
Strep 0.25 + K7.5	500000000	600000000	526.667	0.999999	8.77777e-07	10.3284	-0.638734		Strep 0.25 + K7.5	3.33333e+08	6.33333e+08	2233.33	0.999996	3.5263e-06	10.9432	0.208108		Strep 0.25 + K7.5	2.58333e+08	1.98333e+08	3333.33	0.999983	1.68064e-05	10.5101	1.31473
Strep 0.25+ K1	2.93333e+08	3.66667e+08	3100000	0.991616	0.00838367	9.96578	4.07973		Strep 0.25+ K1	4.33333e+08	2.73333e+08	35000000	0.886486	0.113514	9.73088	6.92347		Strep 0.25+ K1	4.33333e+08	800000000	8.83333e+06	0.989079	0.0109211	11.3889	6.16232
Strep 0.25 + K0.1	3.66667e+08	4.33333e+08	1.13333e+08	0.792683	0.207317	10.8082	8.27189		Strep 0.25 + K0.1	5.66667e+08	3.21667e+08	2.51667e+08	0.561047	0.438953	11.6514	9.71234		Strep 0.25 + K0.1	4.66667e+08	98000000	2.26667e+08	0.301848	0.698152	9.6736	8.82443
Day 3 - Following 1:1000 Dilution, and a second overnight incubation:						GENERATIONS:			Day 3 - Following 1:1000 Dilution, and a second overnight incubation:						GENERATIONS:			Day 3 - Following 1:1000 Dilution, and a second overnight incubation:						GENERATIONS:
Treatment:	LB Titre	Nx	Cm	Proportion AH204	Proportion AH211	AH204	AH211		Treatment:	LB Titre	Nx	Cm	Proportion AH204	Proportion AH211	AH204	AH211		Treatment:	LB Titre	Nx	Cm	Proportion AH204	Proportion AH211	AH204	AH211
LB	3.66667e+08	235000000	400000000	0.370079	0.629921	10.713	10.2288		LB	400000000	185000000	4.33333e+08	0.299191	0.700809	10.5028	9.96578		LB	4.33333e+08	1.11667e+08	5.33333e+08	0.173127	0.826873	9.44691	9.64386
Kamba 7.5mM	2.66667e+08	170000000	130000000	0.566667	0.433333	10.2984	9.6306		Kamba 7.5mM	300000000	160000000	138000000	0.536913	0.463087	10.3808	9.24988		Kamba 7.5mM	5.33333e+08	2.01667e+08	1.56667e+08	0.562791	0.437209	10.1432	9.68748
Kamba 1mM	5.66667e+08	3.13333e+08	160000000	0.661972	0.338028	10.8998	9.90689		Kamba 1mM	6.66667e+08	290000000	4.33333e+08	0.400922	0.599078	11.2388	10.5873		Kamba 1mM	8.33333e+08	3.66667e+08	400000000	0.478261	0.521739	11.3344	9.85031
Kamba 0.1mM	6.33333e+08	2.58333e+08	2.28333e+08	0.530822	0.469178	9.33502	9.78955		Kamba 0.1mM	7.33333e+08	2.33333e+08	6.66667e+08	0.259259	0.740741	10.2929	10.2002		Kamba 0.1mM	500000000	100000000	3.66667e+08	0.214286	0.785714	9.48036	9.25529
Strep 0.25µg/ml	4.66667e+08	4.33333e+08	80000000	0.844156	0.155844	10.0813	9.19319		Strep 0.25µg/ml	2.33333e+08	2.06667e+08	1.73333e+08	0.54386	0.45614	10.6721	9.02237		Strep 0.25µg/ml	5.66667e+08	3.33333e+08	205000000	0.619195	0.380805	10.7027	9.51598
Strep 0.25 + K7.5	4.33333e+08	2.88333e+08	10	1	3.46821e-08	8.90856	4.24697		Strep 0.25 + K7.5	285000000	240000000	10	1	4.16667e-08	8.56585	2.16273		Strep 0.25 + K7.5	6.33333e+08	8.33333e+08	130	1	1.56e-07	12.0368	5.2854
Strep 0.25+ K1	4.66667e+08	800000000	133333	0.999833	0.000166639	11.0913	5.42663		Strep 0.25+ K1	5.33333e+08	3.83333e+08	1.61667e+06	0.9958	0.00419968	10.4537	5.52952		Strep 0.25+ K1	600000000	300000000	680000	0.997738	0.00226154	8.55075	6.26643
Strep 0.25 + K0.1	800000000	800000000	47500000	0.943953	0.0560472	10.8503	8.71121		Strep 0.25 + K0.1	3.66667e+08	3.11667e+08	165000000	0.653846	0.346154	9.92022	9.35674		Strep 0.25 + K0.1	7.33333e+08	5.33333e+08	400000000	0.571429	0.428571	12.41	10.7852
Day 4 - Following 1:1000 Dilution, and a second overnight incubation:						GENERATIONS:			Day 4 - Following 1:1000 Dilution, and a second overnight incubation:						GENERATIONS:			Day 4 - Following 1:1000 Dilution, and a second overnight incubation:						GENERATIONS:
Treatment:	LB Titre	Nx	Cm	Proportion AH204	Proportion AH211	AH204	AH211		Treatment:	LB Titre	Nx	Cm	Proportion AH204	Proportion AH211	AH204	AH211		Treatment:	LB Titre	Nx	Cm	Proportion AH204	Proportion AH211	AH204	AH211
LB	8.33333e+08	3.66667e+08	600000000	0.37931	0.62069	10.6076	10.5507		LB	4.33333e+08	1.46667e+08	5.66667e+08	0.205607	0.794393	9.6308	10.3528		LB	1000000000	2.56667e+08	6.66667e+08	0.277978	0.722022	11.1665	10.2877
Kamba 7.5mM	3.33333e+08	128000000	150000000	0.460432	0.539568	9.55639	10.1722		Kamba 7.5mM	2.43333e+08	156000000	172000000	0.47561	0.52439	9.92926	10.2835		Kamba 7.5mM	4.33333e+08	2.31667e+08	1.38333e+08	0.626126	0.373874	10.1659	9.78623
Kamba 1mM	5.33333e+08	500000000	2.16667e+08	0.697674	0.302326	10.64	10.4032		Kamba 1mM	7.66667e+08	200000000	300000000	0.4	0.6	9.42973	9.43527		Kamba 1mM	8.33333e+08	2.48333e+08	250000000	0.498328	0.501672	9.40359	9.28771
Kamba 0.1mM	7.66667e+08	500000000	245000000	0.671141	0.328859	10.9185	10.0674		Kamba 0.1mM	5.66667e+08	180000000	295000000	0.378947	0.621053	9.59139	8.78953		Kamba 0.1mM	800000000	3.33333e+08	5.33333e+08	0.384615	0.615385	11.7027	10.5064
Strep 0.25µg/ml	5.33333e+08	6.33333e+08	3.33333e+07	0.95	0.05	10.5133	8.70275		Strep 0.25µg/ml	800000000	5.66667e+08	2.66667e+08	0.68	0.32	11.421	10.5873		Strep 0.25µg/ml	9.33333e+08	500000000	1.16667e+08	0.810811	0.189189	10.5507	9.15255
Strep 0.25 + K7.5	3.66667e+08	300000000	10	1	3.33333e-08	10.023	9.96578		Strep 0.25 + K7.5	5.33333e+08	3.33333e+08	10	1	3e-08	10.4397	9.96578		Strep 0.25 + K7.5	600000000	600000000	10	1	1.66667e-08	9.49185	6.26534
Strep 0.25+ K1	5.66667e+08	300000000	13666.7	0.999954	4.55535e-05	8.55075	6.67948		Strep 0.25+ K1	6.66667e+08	6.66667e+08	150000	0.999775	0.000224949	10.7642	6.5358		Strep 0.25+ K1	1.26667e+09	7.33333e+08	68000	0.999907	9.27187e-05	11.2553	6.64386
Strep 0.25 + K0.1	600000000	5.33333e+08	3040000	0.994332	0.00566769	9.38082	6		Strep 0.25 + K0.1	1400000000	1.23333e+09	1.96667e+08	0.862471	0.137529	11.9503	10.2191		Strep 0.25 + K0.1	3.66667e+08	500000000	29500000	0.944287	0.0557129	9.87267	6.20457
						TOTAL GENERATIONS									TOTAL GENERATIONS									TOTAL GENERATIONS
						AH204	AH211								AH204	AH211								AH204	AH211
						47.0595	47.0331								45.1851	47.894								46.0595	48.659
						45.5412	45.0331								45.2741	46.1739								45.9117	46.3902
						47.507	45.5636								45.6325	46.9765								46.0119	47.244
						47.507	45.7409		SUMMARY OF ALL RUNS						45.4805	46.9522								46.4366	48.3371
						47.848	42.8631								47.135	46.8066								47.0216	46.1444
						46.77	21.1946		AH204/AH211 (Ratio of Resistant to Susceptible Bacteria)						46.3695	22.138								47.2846	22.6685
						46.77	31.611		DAY 4 Only						47.3695	36.0107								47.5741	35.3999
						47.6001	39.4083			REP1	REP2	REP3	AVERAGE	SEM	48.257	46.3673								47.0216	44.1608
									LB	0.611111	0.258824	0.385	0.418312	0.103052
									Kamba 7.5mM	0.853333	0.906977	1.6747	1.145	0.2653
									Kamba 1mM	2.30769	0.666667	0.993333	1.32256	0.50151
									Kamba 0.1mM	2.04082	0.610169	0.625	1.092	0.47443
									Strep 0.25µg/ml	19	2.125	4.28571	8.47024	5.3017
									Strep 0.25 + K7.5	30000000	3.33333e+07	60000000	4.11111e+07	9.49334e+06
									Strep 0.25+ K1	21951.2	4444.44	10784.3	12393.3	5117.4
									Strep 0.25 + K0.1	175.439	6.27119	16.9492	66.2196	54.6964
													Data reported in MS

## Sheet: Rup+Tet
AH201 (Tet resistant) vs AH214 (Tet Susceptible)
AH201 can grow on Ampicillin but not Chloramphenicol
AH214 can grow on Chloramphenicol but not Ampicillin
TEST 1:									TEST 2:									TEST 3:
Starting Overnight Titres (cfu/ml):			Amt added to Comp	Starting cfu/ml	Starting Proportion				Starting Overnight Titres (cfu/ml):			Amt added to Comp	Starting cfu/ml	Starting Proportion				Starting Overnight Titres (cfu/ml):			Amt added to Comp	Starting cfu/ml	Starting Proportion
AH201	1.06667e+09		53333.3	5333.33	0.5				AH201	1100000000		55000	5500	0.540984				AH201	6.66667e+08		33333.3	3333.33	0.392157
AH214	1.06667e+09		53333.3	5333.33	0.5				AH214	9.33333e+08		46666.7	4666.67	0.459016				AH214	1.03333e+09		51666.7	5166.67	0.607843
Day 1 - Following Overnight Incubation:						GENERATIONS:			Day 1 - Following Overnight Incubation:						GENERATIONS:			Day 1 - Following Overnight Incubation:						GENERATIONS:
Treatment:	LB Titre	Amp	Cm	Proportion AH201	Proportion AH214	AH201	AH214		Treatment:	LB Titre	Amp	Cm	Proportion AH201	Proportion AH214	AH201	AH214		Treatment:	LB Titre	Amp	Cm	Proportion AH201	Proportion AH214	AH201	AH214
LB	3.66667e+08	2.56667e+08	182000000	0.585106	0.414894	15.5545	15.0585		LB	4.66667e+08	195000000	2.11667e+08	0.479508	0.520492	15.1137	15.469		LB	6.66667e+08	372000000	700000000	0.347015	0.652985	16.768	17.0478
Roundup 0.1mM	5.33333e+08	304000000	2.51667e+08	0.547091	0.452909	15.7987	15.5261		Roundup 0.1mM	500000000	200000000	2.36667e+08	0.458015	0.541985	15.1502	15.6301		Roundup 0.1mM	6.66667e+08	2.78333e+08	500000000	0.357602	0.642398	16.3495	16.5623
Roundup 0.5mM	300000000	138000000	1.46667e+08	0.484778	0.515222	14.6593	14.7471		Roundup 0.5mM	5.33333e+08	198000000	3.11667e+08	0.388489	0.611511	15.1357	16.0273		Roundup 0.5mM	800000000	1.86667e+08	4.66667e+08	0.285714	0.714286	15.7731	16.4628
Roundup 2.5mM	300000000	3.66667e+08	3.83333e+07	0.90535	0.0946502	16.0691	12.8113		Roundup 2.5mM	3.33333e+08	175000000	62500000	0.736842	0.263158	14.9576	13.7092		Roundup 2.5mM	3.08333e+08	1.53333e+08	210000000	0.422018	0.577982	15.4893	15.3108
Tet 0.05µg/ml	6.66667e+08	2.68333e+08	2.23333e+08	0.545763	0.454237	15.6186	15.3538		Tet 0.05µg/ml	5.33333e+08	2.33333e+08	440000000	0.346535	0.653465	15.3726	16.5248		Tet 0.05µg/ml	8.33333e+08	2.03333e+08	3.66667e+08	0.356725	0.643275	15.8965	16.1149
Tet + Roundup 0.1	7.33333e+08	500000000	3.41667e+08	0.594059	0.405941	16.5165	15.9672		Tet + Roundup 0.1	3.33333e+08	202000000	3.86667e+08	0.343148	0.656852	15.1646	16.3383		Tet + Roundup 0.1	600000000	260000000	3.66667e+08	0.414894	0.585106	16.2512	16.1149
Tet + Roundup 0.5	400000000	3.01667e+08	72500000	0.806236	0.193764	15.7876	13.7307		Tet + Roundup 0.5	600000000	400000000	3.03333e+08	0.56872	0.43128	16.1502	15.9882		Tet + Roundup 0.5	700000000	300000000	5.33333e+08	0.36	0.64	16.4576	16.6554
Tet + Roundup 2.5	175000000	170000000	2.47143e+06	0.985671	0.0143295	14.9601	8.85609		Tet + Roundup 2.5	300000000	275000000	2.06667e+06	0.992541	0.0074591	15.6096	8.7907		Tet + Roundup 2.5	2.11667e+08	230000000	960000	0.995843	0.00415656	16.0743	7.53766
Day 2 - Following 1:1000 Dilution, and a second overnight incubation:						GENERATIONS:			Day 2 - Following 1:1000 Dilution, and a second overnight incubation:						GENERATIONS:			Day 2 - Following 1:1000 Dilution, and a second overnight incubation:						GENERATIONS:
Treatment:	LB Titre	Amp	Cm	Proportion AH201	Proportion AH214	AH201	AH214		Treatment:	LB Titre	Amp	Cm	Proportion AH201	Proportion AH214	AH201	AH214		Treatment:	LB Titre	Amp	Cm	Proportion AH201	Proportion AH214	AH201	AH214
LB	4.66667e+08	235000000	2.41667e+08	0.493007	0.506993	9.83855	10.3749		LB	6.66667e+08	1.93333e+08	3.68333e+08	0.344214	0.655786	9.9534	10.765		LB	5.33333e+08	2.68333e+08	3.33333e+08	0.445983	0.554017	9.49451	8.89539
Roundup 0.1mM	5.33333e+08	5.33333e+08	2.31667e+08	0.697168	0.302832	10.7768	9.84632		Roundup 0.1mM	600000000	205000000	2.31667e+08	0.469466	0.530534	10.0014	9.93498		Roundup 0.1mM	600000000	2.28333e+08	2.61667e+08	0.465986	0.534014	9.68011	9.03159
Roundup 0.5mM	500000000	4.33333e+08	160000000	0.730337	0.269663	11.6166	10.0913		Roundup 0.5mM	300000000	185000000	1.93333e+08	0.488987	0.511013	9.86781	9.27687		Roundup 0.5mM	6.66667e+08	7.33333e+08	400000000	0.647059	0.352941	11.9398	9.74339
Roundup 2.5mM	3.66667e+08	245000000	10800000	0.95778	0.0422205	9.3841	8.13822		Roundup 2.5mM	160000000	2.03333e+08	176000000	0.536028	0.463972	10.1823	11.4594		Roundup 2.5mM	205000000	1.98333e+08	128000000	0.607763	0.392237	10.337	9.25154
Tet 0.05µg/ml	5.33333e+08	345000000	165000000	0.676471	0.323529	10.3284	9.52905		Tet 0.05µg/ml	600000000	2.18333e+08	218000000	0.500382	0.499618	9.86992	8.95261		Tet 0.05µg/ml	8.66667e+08	200000000	3.16667e+08	0.387097	0.612903	9.94194	9.75428
Tet + Roundup 0.1	250000000	280000000	1.33333e+08	0.677419	0.322581	9.12928	8.60823		Tet + Roundup 0.1	7.33333e+08	2.21667e+08	2.98333e+08	0.426282	0.573718	10.0998	9.59162		Tet + Roundup 0.1	5.66667e+08	2.93333e+08	2.16667e+08	0.575163	0.424837	10.1398	9.20679
Tet + Roundup 0.5	300000000	2.36667e+08	3.33333e+07	0.876543	0.123457	9.61569	8.84477		Tet + Roundup 0.5	3.66667e+08	2.38333e+08	1.31667e+08	0.644144	0.355856	9.21877	8.76177		Tet + Roundup 0.5	6.66667e+08	3.33333e+08	3.16667e+08	0.512821	0.487179	10.1178	9.21371
Tet + Roundup 2.5	184000000	157500000	17500	0.999889	0.000111099	9.8556	2.82394		Tet + Roundup 2.5	4.33333e+08	5.66667e+08	251667	0.999556	0.00044392	11.0089	6.92806		Tet + Roundup 2.5	1.91667e+08	1.56667e+08	4000000	0.975104	0.0248963	9.41185	12.0247
Day 3 - Following 1:1000 Dilution, and a second overnight incubation:						GENERATIONS:			Day 3 - Following 1:1000 Dilution, and a second overnight incubation:						GENERATIONS:			Day 3 - Following 1:1000 Dilution, and a second overnight incubation:						GENERATIONS:
Treatment:	LB Titre	Amp	Cm	Proportion AH201	Proportion AH214	AH201	AH214		Treatment:	LB Titre	Amp	Cm	Proportion AH201	Proportion AH214	AH201	AH214		Treatment:	LB Titre	Amp	Cm	Proportion AH201	Proportion AH214	AH201	AH214
LB	600000000	5.66667e+08	3.23333e+08	0.636704	0.363296	11.2356	10.3858		LB	5.66667e+08	2.06667e+08	2.88333e+08	0.417508	0.582492	10.062	9.61251		LB	7.66667e+08	205000000	4.33333e+08	0.321149	0.678851	9.57738	10.3443
Roundup 0.1mM	7.66667e+08	400000000	205000000	0.661157	0.338843	9.55075	9.78936		Roundup 0.1mM	7.33333e+08	166000000	3.51667e+08	0.32067	0.67933	9.66134	10.5679		Roundup 0.1mM	8.66667e+08	2.16667e+08	3.33333e+08	0.393939	0.606061	9.89012	10.315
Roundup 0.5mM	4.66667e+08	400000000	1.21667e+08	0.766773	0.233227	9.85031	9.57065		Roundup 0.5mM	500000000	2.11667e+08	235000000	0.473881	0.526119	10.1601	10.2474		Roundup 0.5mM	9.33333e+08	500000000	3.66667e+08	0.576923	0.423077	9.41324	9.84025
Roundup 2.5mM	300000000	4.33333e+08	1.93333e+07	0.95729	0.0427099	10.7885	10.8058		Roundup 2.5mM	4.33333e+08	2.88333e+08	70000000	0.804651	0.195349	10.4697	8.63564		Roundup 2.5mM	162000000	2.66667e+08	3.33333e+07	0.888889	0.111111	10.3929	8.02468
Tet 0.05µg/ml	7.66667e+08	400000000	245000000	0.620155	0.379845	10.1792	10.5361		Tet 0.05µg/ml	7.66667e+08	3.58333e+08	3.33333e+08	0.518072	0.481928	10.6806	10.5784		Tet 0.05µg/ml	8.33333e+08	2.93333e+08	400000000	0.423077	0.576923	10.5183	10.3028
Tet + Roundup 0.1	700000000	4.33333e+08	290000000	0.599078	0.400922	10.5958	11.0868		Tet + Roundup 0.1	5.33333e+08	3.36667e+08	2.78333e+08	0.547425	0.452575	10.5687	9.86567		Tet + Roundup 0.1	8.33333e+08	4.06667e+08	500000000	0.448529	0.551471	10.4371	11.1722
Tet + Roundup 0.5	500000000	4.33333e+08	20000000	0.955882	0.0441176	10.8384	9.22882		Tet + Roundup 0.5	7.33333e+08	5.33333e+08	1.86667e+08	0.740741	0.259259	11.1278	10.4694		Tet + Roundup 0.5	800000000	4.33333e+08	2.93333e+08	0.59633	0.40367	10.3443	9.85536
Tet + Roundup 2.5	5.66667e+08	420000000	10666.7	0.999975	2.53962e-05	11.3808	9.25154		Tet + Roundup 2.5	2.58333e+08	290000000	140000	0.999517	0.000482526	8.99934	9.1197		Tet + Roundup 2.5	3.66667e+08	200000000	336667	0.998319	0.0016805	10.3181	6.39518
Day 4 - Following 1:1000 Dilution, and a second overnight incubation:						GENERATIONS:			Day 4 - Following 1:1000 Dilution, and a second overnight incubation:						GENERATIONS:			Day 4 - Following 1:1000 Dilution, and a second overnight incubation:						GENERATIONS:
Treatment:	LB Titre	Amp	Cm	Proportion AH201	Proportion AH214	AH201	AH214		Treatment:	LB Titre	Amp	Cm	Proportion AH201	Proportion AH214	AH201	AH214		Treatment:	LB Titre	Amp	Cm	Proportion AH201	Proportion AH214	AH201	AH214
LB	6.66667e+08	4.33333e+08	2.11667e+08	0.671835	0.328165	9.57876	9.35456		LB	6.33333e+08	2.26667e+08	600000000	0.274194	0.725806	10.0991	11.023		LB	7.66667e+08	156000000	4.66667e+08	0.250535	0.749465	9.57171	10.0727
Roundup 0.1mM	5.66667e+08	500000000	188000000	0.726744	0.273256	10.2877	9.84089		Roundup 0.1mM	7.33333e+08	174000000	2.86667e+08	0.377713	0.622287	10.0337	9.67095		Roundup 0.1mM	600000000	2.23333e+08	2.86667e+08	0.437908	0.562092	10.0095	9.74819
Roundup 0.5mM	500000000	800000000	1.81667e+08	0.814941	0.185059	10.9658	10.5441		Roundup 0.5mM	500000000	2.11667e+08	254000000	0.454545	0.545455	9.96578	10.078		Roundup 0.5mM	3.66667e+08	2.48333e+08	370000000	0.401617	0.598383	8.95613	9.97884
Roundup 2.5mM	3.33333e+08	4.66667e+08	24000000	0.951087	0.048913	10.0727	10.2777		Roundup 2.5mM	300000000	290000000	30000000	0.90625	0.09375	9.9741	8.74339		Roundup 2.5mM	1200000000	800000000	2.26667e+08	0.779221	0.220779	11.5507	12.7313
Tet 0.05µg/ml	1200000000	6.66667e+08	225000000	0.747664	0.252336	10.7027	9.84293		Tet 0.05µg/ml	900000000	4.33333e+08	4.46667e+08	0.492424	0.507576	10.24	10.388		Tet 0.05µg/ml	600000000	355000000	405000000	0.467105	0.532895	10.2411	9.98371
Tet + Roundup 0.1	800000000	600000000	120000000	0.833333	0.166667	10.4353	8.69277		Tet + Roundup 0.1	700000000	3.03333e+08	3.38333e+08	0.472727	0.527273	9.81537	10.2474		Tet + Roundup 0.1	600000000	300000000	2.66667e+08	0.529412	0.470588	9.5269	9.05889
Tet + Roundup 0.5	7.66667e+08	700000000	1.98333e+07	0.972447	0.0275527	10.6577	9.95371		Tet + Roundup 0.5	5.33333e+08	3.33333e+08	155000000	0.682594	0.317406	9.28771	9.69759		Tet + Roundup 0.5	1300000000	7.66667e+08	3.66667e+08	0.676471	0.323529	10.7889	10.2877
Tet + Roundup 2.5	8.33333e+08	700000000	7500	0.999989	1.07142e-05	10.7027	9.45764		Tet + Roundup 2.5	245000000	2.98333e+08	83333.3	0.999721	0.000279252	10.0067	9.21732		Tet + Roundup 2.5	300000000	230000000	128333	0.999442	0.00055766	10.1674	8.57436
						TOTAL GENERATIONS																		TOTAL GENERATIONS
						AH201	AH214			SUMMARY OF ALL RUNS														AH201	AH214
						46.2074	45.1737																	45.4116	46.3602
						46.4139	45.0027			AH204/AH211 (Ratio of Resistant to Susceptible Bacteria)														45.9292	45.6571
						47.092	44.9532			DAY 4 Only														46.0823	46.0253
						46.3143	42.0331			Treatment:	REP1	REP2	REP3	AVERAGE	SEM									47.77	45.3183
						46.8289	45.2619			LB	2.04724	0.377778	0.334286	0.919769	0.563877									46.5978	46.1557
						46.6769	44.355			Roundup 0.1mM	2.65957	0.606977	0.77907	1.34854	0.657397									46.355	45.5528
						46.8993	41.758			Roundup 0.5mM	4.40367	0.833333	0.671171	1.96939	1.21804									47.7086	46.0122
						46.8993	30.3892			Roundup 2.5mM	19.4444	9.66667	3.52941	10.8802	4.63417									45.9717	34.5319
										Tet 0.05µg/ml	2.96296	0.970149	0.876543	1.60322	0.680409
										Tet + Roundup 0.1	5	0.896552	1.125	2.34052	1.33138
										Tet + Roundup 0.5	35.2941	2.15054	2.09091	13.1785	11.0578
										Tet + Roundup 2.5	93333.3	3580	1792.21	32901.8	30220.2
														data used in MS
