# Supplementary material for: Agrichemicals and antibiotics in combination increase antibiotic resistance evolution
Source: PeerJ. 2018 Oct 12;6:e5801. doi: 10.7717/peerj.5801 (PMC6188010; doi:10.7717/peerj.5801)
Supplement: Supplemental Information 5 [file peerj-06-5801-s005.xlsx]

## Sheet: E. coli Cip Kamba mutation freq
22.-25.8.2016		Titre 1: after 24 hrs in treatment	Titre 2: after 48 hrs in treatment	Titre 3; after 48 hrs in treatment +8 hrs in LB
	Kamba: 10 mM		Cip in liquid: 0.025 ug/ml			Cip on plates; 0.06 ug/ml
Repeat 1											Summary
	Titre 0	Titre1	Titre 2	Titre 3	Cip 0	Cip 3		MF at T0	MF at T3			MF at T3	SEM
LB	1.86667e+09	1.56667e+09	1.33333e+09	1.46667e+09	20	900		1.07143e-08	6.13636e-07		LB	2.35694e-07	1.01245e-07
Kamba		1.13333e+09	7.33333e+08	4.33333e+08		268.5			6.19615e-07		Kamba	3.25243e-06	1.6103e-06
Cip		1.66667e+08	1.66667e+08	5.33333e+08		24000000			0.045		Cip	0.034005	0.01538
Kamba+Cip		100000001	200000000	6.33333e+08		6500			1.02632e-05		Kamba+Cip	1.41652e-05	1.07134e-05
Number of generations		Titre1	Titre 2	Titre 3	Total generations in treatment	All generations
LB		13.0349	13.0551	6.78136	26.09	32.8714			2.352e-08
Kamba		12.5678	12.6597	5.88486	25.2275	31.1124			2.45611e-08
Cip		9.80229	13.2877	8.32193	23.09	31.4119			0.0019489
Kamba+Cip		9.06532	14.2877	8.30682	23.353	31.6599			4.39479e-07
Repeat 2											Data reported in MS
	Titre 0	Titre1	Titre 2	Titre 3	Cip 0	Cip 3		MF at T0	MF at T3		Mutation frequency per generation
LB	1.83333e+09	1600000000	1400000000	1300000000	10	10		5.45455e-09	7.69231e-09			MF at T3	SEM
Kamba		700000000	2.06667e+09	900000000		6000			6.66667e-06		LB	7.50486e-09	3.88548e-09
Cip		400000000	2.33333e+08	7.33333e+08		65000000			0.0886364		Kamba	1.05225e-07	6.29824e-08
Kamba+Cip		1.06667e+09	2.66667e+08	1.06667e+09		300			2.8125e-07		Cip	0.00119481	0.000653961
											Kamba+Cip	4.99661e-07	4.52623e-07
Number of generations		Titre1	Titre 2	Titre 3	Total generations in treatment	All generations
LB		13.0913	13.0951	6.53694	26.1864	32.7233			2.93752e-10
Kamba		11.8987	14.8496	5.44455	26.7483	32.1928			2.49237e-07
Cip		11.0913	12.5101	8.29593	23.6014	31.8974			0.00375555
Kamba+Cip		12.5064	11.2877	8.64386	23.7941	32.4379			1.18202e-08
Repeat 3
	Titre 0	Titre1	Titre 2	Titre 3	Cip 0	Cip 3		MF at T0	MF at T3
LB	2.03333e+09	1.56667e+09	1.33333e+09	1.16667e+09	10	300		4.91803e-09	2.57143e-07
Kamba		2.26667e+09	7.66667e+08	9.33333e+08		300			3.21429e-07
Cip		2.06667e+09	7.33333e+08	700000000		20000000			0.0285714
Kamba+Cip		1.66667e+08	4.66667e+08	1300000000		300			2.30769e-07
Number of generations		Titre1	Titre 2	Titre 3	Total generations in treatment	All generations
LB		12.9116	13.0551	6.45121	25.9666	32.4178			9.90283e-09
Kamba		13.4444	11.7238	6.92765	25.1682	32.0959			1.27712e-08
Cip		13.3112	11.7929	6.57674	25.1041	31.6809			0.00113812
Kamba+Cip		9.6789	14.7731	8.1219	24.452	32.5739			9.43763e-09
Repeat 4
	Titre 0	Titre1	Titre 2	Titre 3	Cip 0	Cip 3		MF at T0	MF at T3
LB	3000000000	1.56667e+09	1.93333e+09	1.33333e+09	10	200		3.33333e-09	1.5e-07
Kamba		7.66667e+08	9.66667e+08	1.06667e+09		8500			7.96875e-06
Cip		1.26667e+09	4.66667e+08	7.66667e+08		4000000			0.00521739
Kamba+Cip		5.33333e+08	400000000	8.33333e+08		50000			6e-05
Number of generations		Titre1	Titre 2	Titre 3	Total generations in treatment	All generations
LB		12.3504	13.5911	6.1078	25.9416	32.0494			5.78223e-09
Kamba		11.3194	13.6221	6.78588	24.9416	31.7274			3.19497e-07
Cip		12.0438	11.8471	7.36006	23.8909	31.251			0.000218384
Kamba+Cip		10.7959	12.8727	7.70275	23.6685	31.3713			2.53501e-06
Repeat 5
	Titre 0	Titre1	Titre 2	Titre 3	Cip 0	Cip 3		MF at T0	MF at T3
LB	1300000000	1500000000	1900000000	1.33333e+09	10	200		7.69231e-09	1.5e-07
Kamba		7.66667e+08	1900000000	1.16667e+09		800			6.85714e-07
Cip		1.03333e+09	2.33333e+08	1000000000		2600000			0.0026
Kamba+Cip		500000000	100000000	1300000000		66			5.07692e-08
Number of generations		Titre1	Titre 2	Titre 3	Total generations in treatment	All generations
LB		13.4942	13.6287	6.13289	27.1229	33.2558			5.53038e-09
Kamba		12.5259	14.597	5.94025	27.1229	33.0632			2.52817e-08
Cip		12.9565	11.1409	8.74339	24.0974	32.8408			0.000107896
Kamba+Cip		11.9092	10.9658	10.3443	22.875	33.2193			2.21942e-09
