# Supplementary material for: Agrichemicals and antibiotics in combination increase antibiotic resistance evolution
Source: PeerJ. 2018 Oct 12;6:e5801. doi: 10.7717/peerj.5801 (PMC6188010; doi:10.7717/peerj.5801)
Supplement: Supplemental Information 7 [file peerj-06-5801-s007.xlsx]

## Sheet: Comparisons
Well Row	Well Col	Content	Group	Blank corrected based on Raw Data (A-595)	Blank corrected based on Raw Data (A-595)	Blank corrected based on Raw Data (A-595)	Blank corrected based on Raw Data (A-595)	Blank corrected based on Raw Data (A-595)	Blank corrected based on Raw Data (A-595)	Blank corrected based on Raw Data (A-595)	Blank corrected based on Raw Data (A-595)	Blank corrected based on Raw Data (A-595)	Blank corrected based on Raw Data (A-595)	Blank corrected based on Raw Data (A-595)	Blank corrected based on Raw Data (A-595)	Blank corrected based on Raw Data (A-595)	Blank corrected based on Raw Data (A-595)	Blank corrected based on Raw Data (A-595)	Blank corrected based on Raw Data (A-595)	Blank corrected based on Raw Data (A-595)	Blank corrected based on Raw Data (A-595)	Blank corrected based on Raw Data (A-595)	Blank corrected based on Raw Data (A-595)	Blank corrected based on Raw Data (A-595)	Blank corrected based on Raw Data (A-595)	Blank corrected based on Raw Data (A-595)	Blank corrected based on Raw Data (A-595)	Blank corrected based on Raw Data (A-595)	Blank corrected based on Raw Data (A-595)	Blank corrected based on Raw Data (A-595)	Blank corrected based on Raw Data (A-595)	Blank corrected based on Raw Data (A-595)	Blank corrected based on Raw Data (A-595)	Blank corrected based on Raw Data (A-595)	Blank corrected based on Raw Data (A-595)	Blank corrected based on Raw Data (A-595)	Blank corrected based on Raw Data (A-595)	Blank corrected based on Raw Data (A-595)	Blank corrected based on Raw Data (A-595)	Blank corrected based on Raw Data (A-595)	Blank corrected based on Raw Data (A-595)	Blank corrected based on Raw Data (A-595)	Blank corrected based on Raw Data (A-595)	Blank corrected based on Raw Data (A-595)	Blank corrected based on Raw Data (A-595)	Blank corrected based on Raw Data (A-595)	Blank corrected based on Raw Data (A-595)	Blank corrected based on Raw Data (A-595)	Blank corrected based on Raw Data (A-595)
		Time		0 h	0 h 6 min	0 h 12 min	0 h 18 min	0 h 24 min	0 h 30 min	0 h 36 min	0 h 42 min	0 h 48 min	0 h 54 min	1 h	1 h 6 min	1 h 12 min	1 h 18 min	1 h 24 min	1 h 30 min	1 h 36 min	1 h 42 min	1 h 48 min	1 h 54 min	2 h	2 h 6 min	2 h 12 min	2 h 18 min	2 h 24 min	2 h 30 min	2 h 36 min	2 h 42 min	2 h 48 min	2 h 54 min	3 h	3 h 6 min	3 h 12 min	3 h 18 min	3 h 24 min	3 h 30 min	3 h 36 min	3 h 42 min	3 h 48 min	3 h 54 min	4 h	4 h 6 min	4 h 12 min	4 h 18 min	4 h 24 min	4 h 30 min
A	1	Time (Hrs)	A	0										1										2										3										4
A	2	AH204 LB 1	A	0.003	0.004	0.004	0.004	0.005	0.005	0.006	0.008	0.01	0.012	0.015	0.017	0.022	0.026	0.029	0.036	0.044	0.05	0.06	0.07	0.081	0.096	0.111	0.132	0.154	0.173	0.191	0.218	0.246	0.269	0.289	0.311	0.335	0.364	0.388	0.411	0.436	0.46	0.489	0.512	0.536	0.559	0.582	0.601	0.619	0.636
A	3	AH204 LB 2	A	-0.002	-0.002	-0.004	-0.002	-0.002	-0.001	0.0002	0.001	0.003	0.007	0.007	0.011	0.016	0.019	0.021	0.028	0.035	0.042	0.05	0.062	0.072	0.085	0.101	0.123	0.142	0.165	0.182	0.2	0.227	0.256	0.271	0.292	0.316	0.343	0.368	0.394	0.419	0.443	0.47	0.496	0.523	0.546	0.565	0.586	0.606	0.621
A	4	AH204 LB 3	A	-0.001	0.002	0.0006	0.002	0.004	0.004	0.004	0.005	0.009	0.013	0.015	0.017	0.022	0.024	0.028	0.035	0.042	0.05	0.061	0.071	0.082	0.098	0.115	0.137	0.158	0.18	0.199	0.224	0.255	0.273	0.295	0.317	0.342	0.37	0.395	0.418	0.441	0.464	0.492	0.513	0.537	0.559	0.584	0.601	0.62	0.636
A	5	AH204 LB 4	A	0.006	0.007	0.008	0.007	0.005	0.006	0.008	0.01	0.011	0.014	0.015	0.018	0.02	0.022	0.027	0.032	0.036	0.041	0.047	0.052	0.06	0.069	0.079	0.089	0.101	0.115	0.131	0.15	0.169	0.186	0.203	0.224	0.248	0.274	0.29	0.307	0.33	0.355	0.379	0.403	0.426	0.45	0.471	0.495	0.517	0.547
A	6	AH204 LB 5	A	0.006	0.007	0.008	0.007	0.007	0.005	0.01	0.01	0.013	0.015	0.019	0.021	0.024	0.027	0.034	0.041	0.045	0.054	0.064	0.074	0.085	0.1	0.117	0.136	0.156	0.179	0.199	0.21	0.235	0.267	0.285	0.305	0.329	0.353	0.38	0.405	0.431	0.459	0.484	0.51	0.542	0.572	0.59	0.608	0.625	0.646
		LB Average		0.0024	0.0036	0.00332	0.0036	0.0038	0.0038	0.00564	0.0068	0.0092	0.0122	0.0142	0.0168	0.0208	0.0236	0.0278	0.0344	0.0404	0.0474	0.0564	0.0658	0.076	0.0896	0.1046	0.1234	0.1422	0.1624	0.1804	0.2004	0.2264	0.2502	0.2686	0.2898	0.314	0.3408	0.3642	0.387	0.4114	0.4362	0.4628	0.4868	0.5128	0.5372	0.5584	0.5782	0.5974	0.6172
		SEM		0.00169115	0.00169115	0.00229399	0.00169115	0.00152971	0.00124097	0.00168808	0.00171464	0.00168523	0.00139284	0.00195959	0.00162481	0.00135647	0.00143527	0.00208327	0.0021587	0.00206398	0.0025219	0.00332566	0.00397995	0.00454973	0.00576715	0.0069685	0.00894763	0.0106696	0.0121474	0.0127421	0.0132272	0.0151182	0.0162954	0.0168689	0.0169629	0.0170441	0.0173303	0.0190851	0.0203838	0.0206751	0.0206141	0.0212871	0.021174	0.0219258	0.0221842	0.022241	0.0211078	0.0203435	0.0179983
		AH211 LB 1	A	0.007	0.006	0.007	0.005	0.005	0.004	0.008	0.009	0.01	0.015	0.019	0.022	0.024	0.028	0.034	0.043	0.048	0.058	0.069	0.081	0.094	0.115	0.136	0.16	0.185	0.198	0.224	0.256	0.281	0.297	0.313	0.335	0.361	0.383	0.403	0.423	0.444	0.466	0.486	0.511	0.531	0.543	0.554	0.565	0.58	0.596
		AH211 LB 2	A	0.005	0.002	0.005	0.004	0.004	0.004	0.006	0.007	0.011	0.014	0.019	0.021	0.024	0.03	0.037	0.044	0.052	0.062	0.073	0.088	0.105	0.127	0.151	0.176	0.194	0.212	0.242	0.272	0.287	0.304	0.324	0.349	0.373	0.394	0.416	0.435	0.455	0.478	0.502	0.522	0.537	0.55	0.558	0.578	0.589	0.603
		AH211 LB 3	A	0.005	0.006	0.007	0.007	0.006	0.007	0.01	0.011	0.012	0.017	0.021	0.023	0.027	0.031	0.038	0.045	0.053	0.064	0.076	0.09	0.107	0.126	0.151	0.176	0.192	0.21	0.239	0.263	0.279	0.298	0.316	0.34	0.364	0.384	0.405	0.423	0.445	0.465	0.49	0.508	0.52	0.535	0.547	0.564	0.576	0.588
		AH211 LB 4	A	0.001	0.003	0.003	0.004	0.005	0.006	0.007	0.009	0.011	0.015	0.021	0.024	0.032	0.037	0.043	0.054	0.064	0.077	0.092	0.11	0.13	0.152	0.179	0.2	0.216	0.243	0.268	0.283	0.304	0.327	0.352	0.375	0.397	0.42	0.445	0.465	0.484	0.5	0.522	0.539	0.554	0.57	0.583	0.594	0.605	0.618
		AH211 LB 5	A	0.007	0.007	0.006	0.007	0.007	0.006	0.009	0.01	0.013	0.016	0.021	0.024	0.029	0.034	0.04	0.048	0.056	0.067	0.081	0.094	0.11	0.131	0.154	0.179	0.197	0.215	0.243	0.268	0.284	0.302	0.327	0.35	0.374	0.397	0.418	0.443	0.464	0.484	0.502	0.522	0.54	0.553	0.569	0.582	0.595	0.607
		LB Average		0.005	0.0048	0.0056	0.0054	0.0054	0.0054	0.008	0.0092	0.0114	0.0154	0.0202	0.0228	0.0272	0.032	0.0384	0.0468	0.0546	0.0656	0.0782	0.0926	0.1092	0.1302	0.1542	0.1782	0.1968	0.2156	0.2432	0.2684	0.287	0.3056	0.3264	0.3498	0.3738	0.3956	0.4174	0.4378	0.4584	0.4786	0.5004	0.5204	0.5364	0.5502	0.5622	0.5766	0.589	0.6024
		SEM		0.00109545	0.000969536	0.000748331	0.000678233	0.000509902	0.0006	0.000707107	0.000663325	0.000509902	0.000509902	0.000489898	0.000583095	0.00152971	0.00158114	0.00150333	0.00198494	0.00267582	0.00320312	0.00396737	0.00483322	0.00586003	0.00606135	0.0069527	0.00639062	0.00519038	0.00743371	0.00708096	0.00452327	0.00446094	0.00550091	0.00688912	0.00689493	0.00631981	0.00668281	0.00750067	0.00778717	0.00736614	0.0064467	0.00627375	0.0054461	0.00557315	0.00584294	0.00630397	0.0056	0.00520577	0.00506557
B	1		B
B	2	AH204 Kamba 1	B	0.005	0.005	0.005	0.005	0.006	0.007	0.008	0.009	0.009	0.01	0.013	0.014	0.015	0.02	0.021	0.023	0.026	0.031	0.032	0.036	0.04	0.045	0.052	0.059	0.064	0.072	0.082	0.094	0.102	0.116	0.129	0.139	0.152	0.162	0.175	0.187	0.201	0.21	0.224	0.235	0.248	0.259	0.275	0.293	0.31	0.326
B	3	AH204 Kamba 2	B	0.005	0.005	0.005	0.004	0.005	0.006	0.008	0.008	0.009	0.012	0.013	0.016	0.016	0.021	0.021	0.024	0.028	0.033	0.035	0.038	0.042	0.049	0.055	0.063	0.068	0.078	0.09	0.1	0.111	0.125	0.138	0.149	0.164	0.175	0.189	0.203	0.216	0.227	0.241	0.252	0.269	0.283	0.301	0.319	0.337	0.354
B	4	AH204 Kamba 3	B	0.001	0.001	0.002	0.001	0.003	0.003	0.003	0.005	0.007	0.008	0.01	0.012	0.014	0.019	0.022	0.024	0.029	0.032	0.038	0.043	0.048	0.056	0.065	0.076	0.084	0.095	0.109	0.124	0.139	0.155	0.169	0.183	0.201	0.215	0.231	0.243	0.259	0.274	0.291	0.309	0.328	0.346	0.365	0.383	0.399	0.415
B	5	AH204 Kamba 4	B	0.006	0.005	0.004	0.005	0.005	0.005	0.005	0.006	0.008	0.009	0.011	0.013	0.015	0.017	0.016	0.021	0.023	0.028	0.029	0.034	0.037	0.04	0.045	0.049	0.055	0.06	0.066	0.072	0.082	0.091	0.1	0.112	0.124	0.136	0.15	0.161	0.173	0.185	0.198	0.212	0.224	0.238	0.25	0.262	0.273	0.29
B	6	AH204 Kamba 5	B	0.005	0.003	0.002	0.0007	0.005	0.004	0.005	0.008	0.007	0.01	0.012	0.014	0.016	0.02	0.02	0.024	0.028	0.033	0.035	0.041	0.045	0.051	0.058	0.065	0.074	0.084	0.094	0.105	0.121	0.135	0.15	0.165	0.176	0.194	0.21	0.226	0.241	0.253	0.268	0.283	0.299	0.318	0.336	0.354	0.37	0.387
		Kamba Average		0.0044	0.0038	0.0036	0.00314	0.0048	0.005	0.0058	0.0072	0.008	0.0098	0.0118	0.0138	0.0152	0.0194	0.02	0.0232	0.0268	0.0314	0.0338	0.0384	0.0424	0.0482	0.055	0.0624	0.069	0.0778	0.0882	0.099	0.111	0.1244	0.1372	0.1496	0.1634	0.1764	0.191	0.204	0.218	0.2298	0.2444	0.2582	0.2736	0.2888	0.3054	0.3222	0.3378	0.3544
		SEM		0.00087178	0.0008	0.000678233	0.00095373	0.000489898	0.000707107	0.000969536	0.000734847	0.000447214	0.000663325	0.000583095	0.000663325	0.000374166	0.000678233	0.00104881	0.000583095	0.00106771	0.000927362	0.00152971	0.00163095	0.00191311	0.00270924	0.00330151	0.00437721	0.00485798	0.0058515	0.0070739	0.00841427	0.00950263	0.0105717	0.0114604	0.0119983	0.0127577	0.013493	0.0139678	0.0143944	0.0150466	0.0156506	0.0162929	0.0171855	0.0183592	0.0195279	0.020617	0.0214415	0.0220848	0.0220105
		AH211 Kamba 1	B	0.002	0.001	0.002	0.002	0.003	0.003	0.004	0.007	0.006	0.007	0.009	0.011	0.012	0.016	0.017	0.02	0.022	0.024	0.028	0.032	0.037	0.04	0.046	0.051	0.058	0.066	0.074	0.084	0.096	0.108	0.119	0.134	0.145	0.16	0.17	0.185	0.202	0.217	0.231	0.244	0.256	0.268	0.285	0.301	0.315	0.329
		AH211 Kamba 2	B	0.002	0.003	0.001	0.002	0.005	0.004	0.005	0.008	0.009	0.01	0.012	0.014	0.017	0.019	0.019	0.024	0.027	0.032	0.035	0.038	0.045	0.05	0.057	0.065	0.074	0.082	0.094	0.105	0.122	0.137	0.149	0.162	0.174	0.192	0.21	0.224	0.237	0.25	0.264	0.279	0.293	0.313	0.327	0.341	0.355	0.368
		AH211 Kamba 3	B	0.002	0.002	0.001	0.001	0.005	0.002	0.003	0.006	0.006	0.008	0.01	0.011	0.014	0.018	0.018	0.021	0.023	0.029	0.032	0.034	0.04	0.045	0.051	0.058	0.065	0.072	0.085	0.093	0.107	0.121	0.134	0.148	0.158	0.172	0.188	0.203	0.22	0.233	0.247	0.259	0.27	0.287	0.302	0.319	0.333	0.351
		AH211 Kamba 4	B	0.004	0.004	0.005	0.004	0.005	0.006	0.008	0.009	0.01	0.012	0.013	0.016	0.017	0.022	0.022	0.024	0.028	0.032	0.035	0.038	0.043	0.048	0.056	0.062	0.069	0.077	0.088	0.098	0.109	0.123	0.135	0.144	0.156	0.167	0.18	0.193	0.205	0.216	0.227	0.239	0.251	0.261	0.277	0.292	0.308	0.321
		AH211 Kamba 5	B	0.008	0.006	0.006	0.005	0.006	0.006	0.009	0.01	0.008	0.011	0.013	0.015	0.017	0.02	0.02	0.023	0.025	0.028	0.03	0.035	0.04	0.044	0.05	0.057	0.062	0.07	0.079	0.09	0.098	0.113	0.124	0.136	0.149	0.159	0.173	0.186	0.201	0.213	0.225	0.235	0.25	0.259	0.276	0.29	0.306	0.322
		Kamba Average		0.0036	0.0032	0.003	0.0028	0.0048	0.0042	0.0058	0.008	0.0078	0.0096	0.0114	0.0134	0.0154	0.019	0.0192	0.0224	0.025	0.029	0.032	0.0354	0.041	0.0454	0.052	0.0586	0.0656	0.0734	0.084	0.094	0.1064	0.1204	0.1322	0.1448	0.1564	0.17	0.1842	0.1982	0.213	0.2258	0.2388	0.2512	0.264	0.2776	0.2934	0.3086	0.3234	0.3382
		SEM		0.00116619	0.000860233	0.00104881	0.000734847	0.000489898	0.0008	0.00115758	0.000707107	0.0008	0.000927362	0.000812404	0.00102956	0.00102956	0.001	0.000860233	0.000812404	0.00114018	0.00148324	0.0013784	0.00116619	0.0013784	0.00172047	0.00202485	0.00237908	0.00276767	0.00278568	0.00347851	0.00356371	0.00463249	0.0049558	0.00517107	0.005004	0.00498598	0.00599166	0.00715821	0.00720694	0.00690652	0.0069814	0.00739189	0.00805233	0.00808084	0.0101371	0.00960521	0.00958436	0.0092228	0.00920543
C	1		C
C	2	AH204 Strep 1	C	0.0006	0.001	0.003	0.001	0.003	0.003	0.005	0.006	0.007	0.01	0.016	0.017	0.02	0.022	0.028	0.033	0.039	0.046	0.054	0.065	0.076	0.089	0.105	0.122	0.144	0.166	0.186	0.206	0.235	0.264	0.279	0.302	0.326	0.353	0.379	0.407	0.428	0.453	0.481	0.505	0.53	0.553	0.573	0.598	0.615	0.633
C	3	AH204 Strep 2	C	0.0006	0.0001	0.002	0.0003	0.002	0.003	0.005	0.006	0.008	0.009	0.014	0.015	0.02	0.022	0.028	0.034	0.038	0.046	0.053	0.065	0.077	0.089	0.106	0.125	0.147	0.169	0.186	0.205	0.229	0.259	0.271	0.294	0.317	0.342	0.368	0.398	0.419	0.446	0.47	0.497	0.526	0.547	0.566	0.588	0.605	0.622
C	4	AH204 Strep 3	C	-0.003	0.0008	0.001	0	0.001	0.002	0.003	0.004	0.007	0.009	0.013	0.014	0.02	0.021	0.027	0.032	0.04	0.047	0.056	0.067	0.078	0.093	0.109	0.129	0.151	0.173	0.193	0.215	0.245	0.272	0.286	0.31	0.335	0.362	0.386	0.412	0.436	0.462	0.487	0.512	0.534	0.557	0.579	0.602	0.619	0.636
C	5	AH204 Strep 4	C	0.002	0.003	0.004	0.005	0.004	0.005	0.006	0.008	0.009	0.009	0.013	0.015	0.018	0.021	0.024	0.028	0.033	0.038	0.044	0.047	0.056	0.063	0.072	0.082	0.095	0.108	0.12	0.14	0.158	0.176	0.192	0.211	0.231	0.258	0.28	0.295	0.317	0.338	0.364	0.389	0.413	0.441	0.462	0.484	0.507	0.534
C	6	AH204 Strep 5	C	0.003	0.004	0.003	0.004	0.005	0.008	0.007	0.01	0.009	0.012	0.016	0.017	0.021	0.027	0.029	0.036	0.043	0.049	0.059	0.068	0.08	0.092	0.107	0.124	0.145	0.166	0.187	0.204	0.22	0.25	0.277	0.293	0.313	0.337	0.364	0.393	0.419	0.441	0.47	0.496	0.524	0.558	0.583	0.598	0.615	0.64
		Strep Average		0.00064	0.00178	0.0026	0.00206	0.003	0.0042	0.0052	0.0068	0.008	0.0098	0.0144	0.0156	0.0198	0.0226	0.0272	0.0326	0.0386	0.0452	0.0532	0.0624	0.0734	0.0852	0.0998	0.1164	0.1364	0.1564	0.1744	0.194	0.2174	0.2442	0.261	0.282	0.3044	0.3304	0.3554	0.381	0.4038	0.428	0.4544	0.4798	0.5054	0.5312	0.5526	0.574	0.5922	0.613
		SEM		0.00101666	0.000735119	0.000509902	0.00102157	0.000707107	0.00106771	0.000663325	0.0010198	0.000447214	0.000583095	0.000678233	0.0006	0.000489898	0.0011225	0.000860233	0.00132665	0.00163095	0.00188149	0.00251794	0.00389358	0.0044	0.00560714	0.0069814	0.00867525	0.0104192	0.012168	0.0136624	0.0136418	0.0153968	0.0174195	0.0174155	0.0180139	0.0187393	0.0186134	0.0192499	0.0217555	0.0219303	0.022775	0.0228355	0.0228854	0.0231638	0.0226327	0.0228311	0.0226186	0.0214252	0.019975
			C
		AH211 Strep 1	C	-0.005	-0.002	-0.003	-0.0005	-0.002	0.001	0.002	0.001	0.005	0.006	0.008	0.011	0.013	0.016	0.02	0.023	0.027	0.033	0.039	0.046	0.055	0.066	0.078	0.092	0.11	0.133	0.154	0.177	0.191	0.218	0.248	0.273	0.286	0.305	0.326	0.352	0.374	0.395	0.417	0.436	0.457	0.481	0.504	0.521	0.534	0.544
		AH211 Strep 2	C	-0.003	-0.004	-0.003	-0.002	-0.003	-0.0007	-0.0008	0.001	0.002	0.005	0.008	0.009	0.012	0.016	0.019	0.022	0.028	0.033	0.039	0.045	0.055	0.064	0.076	0.092	0.109	0.131	0.154	0.177	0.192	0.219	0.246	0.269	0.285	0.305	0.327	0.35	0.373	0.393	0.418	0.438	0.458	0.479	0.503	0.522	0.537	0.547
		AH211 Strep 3	C	0.003	0.002	0.003	0.004	0.003	0.005	0.005	0.006	0.007	0.009	0.012	0.015	0.018	0.022	0.026	0.028	0.036	0.038	0.047	0.053	0.063	0.073	0.086	0.101	0.119	0.143	0.167	0.188	0.203	0.23	0.258	0.273	0.29	0.311	0.334	0.357	0.382	0.4	0.423	0.444	0.463	0.487	0.509	0.525	0.54	0.553
		AH211 Strep 4	C	0.002	0.003	0.005	0.003	0.005	0.005	0.008	0.01	0.011	0.015	0.02	0.022	0.027	0.029	0.035	0.041	0.048	0.056	0.068	0.081	0.095	0.109	0.132	0.155	0.181	0.196	0.215	0.243	0.264	0.28	0.298	0.323	0.347	0.371	0.39	0.415	0.437	0.46	0.478	0.497	0.515	0.53	0.542	0.554	0.57	0.582
		AH211 Strep 5	C	0.005	0.004	0.004	0.005	0.007	0.008	0.009	0.011	0.013	0.014	0.019	0.021	0.025	0.026	0.032	0.037	0.041	0.048	0.058	0.067	0.078	0.089	0.107	0.125	0.147	0.17	0.187	0.202	0.229	0.255	0.268	0.289	0.311	0.334	0.356	0.381	0.401	0.426	0.448	0.468	0.485	0.507	0.521	0.536	0.546	0.559
		Strep Average		0.0004	0.0006	0.0012	0.0019	0.002	0.00366	0.00464	0.0058	0.0076	0.0098	0.0134	0.0156	0.019	0.0218	0.0264	0.0302	0.036	0.0416	0.0502	0.0584	0.0692	0.0802	0.0958	0.113	0.1332	0.1546	0.1754	0.1974	0.2158	0.2404	0.2636	0.2854	0.3038	0.3252	0.3466	0.371	0.3934	0.4148	0.4368	0.4566	0.4756	0.4968	0.5158	0.5316	0.5454	0.557
		SEM		0.0018868	0.00153623	0.00174356	0.00134536	0.00194936	0.00155743	0.00183019	0.00213073	0.00198997	0.0020347	0.0026	0.0026	0.00304959	0.00261534	0.00317175	0.00378682	0.00396232	0.00452327	0.00565155	0.00688186	0.00769675	0.00843445	0.0105849	0.012112	0.0137855	0.0124684	0.0115957	0.0122906	0.0138615	0.0119357	0.00945304	0.010008	0.0117873	0.0126349	0.0121227	0.0123167	0.0120025	0.012757	0.0117448	0.0116	0.0110797	0.00966644	0.00728972	0.00620161	0.0064622	0.00676018
D	1		D
D	2	AH204 Strep + K 1	D	0.007	0.006	0.008	0.006	0.008	0.009	0.007	0.01	0.01	0.012	0.014	0.014	0.018	0.022	0.024	0.024	0.029	0.033	0.038	0.042	0.047	0.054	0.058	0.065	0.076	0.084	0.096	0.108	0.122	0.136	0.148	0.162	0.175	0.19	0.206	0.218	0.232	0.245	0.258	0.273	0.287	0.306	0.325	0.343	0.361	0.378
D	3	AH204 Strep + K 2	D	0.001	0.005	0.004	0.003	0.004	0.005	0.005	0.006	0.007	0.009	0.009	0.011	0.015	0.017	0.02	0.022	0.025	0.028	0.032	0.038	0.041	0.045	0.049	0.058	0.063	0.071	0.079	0.09	0.101	0.112	0.125	0.139	0.151	0.163	0.175	0.188	0.203	0.217	0.229	0.242	0.252	0.266	0.282	0.296	0.312	0.329
D	4	AH204 Strep + K 3	D	0.003	0.008	0.008	0.007	0.008	0.007	0.008	0.011	0.011	0.012	0.015	0.015	0.02	0.023	0.024	0.026	0.031	0.034	0.04	0.045	0.048	0.055	0.062	0.069	0.078	0.087	0.098	0.109	0.123	0.135	0.149	0.162	0.174	0.188	0.202	0.215	0.228	0.239	0.25	0.265	0.277	0.295	0.311	0.329	0.348	0.365
D	5	AH204 Strep + K 4	D	0.003	0.003	0	0.003	0.004	0.003	0.002	0.003	0.005	0.006	0.007	0.008	0.008	0.008	0.01	0.011	0.013	0.014	0.016	0.018	0.02	0.02	0.02	0.023	0.025	0.029	0.031	0.033	0.034	0.039	0.042	0.044	0.047	0.052	0.056	0.061	0.064	0.073	0.076	0.082	0.089	0.096	0.102	0.111	0.119	0.126
D	6	AH204 Strep + K 5	D	0.007	0.007	0.005	0.007	0.008	0.007	0.008	0.009	0.012	0.012	0.014	0.015	0.016	0.019	0.021	0.024	0.027	0.029	0.033	0.036	0.04	0.041	0.047	0.051	0.056	0.063	0.071	0.076	0.084	0.095	0.107	0.115	0.125	0.139	0.149	0.161	0.173	0.185	0.199	0.213	0.227	0.238	0.25	0.262	0.271	0.285
		Strep + K Average		0.0042	0.0058	0.005	0.0052	0.0064	0.0062	0.006	0.0078	0.009	0.0102	0.0118	0.0126	0.0154	0.0178	0.0198	0.0214	0.025	0.0276	0.0318	0.0358	0.0392	0.043	0.0472	0.0532	0.0596	0.0668	0.075	0.0832	0.0928	0.1034	0.1142	0.1244	0.1344	0.1464	0.1576	0.1686	0.18	0.1918	0.2024	0.215	0.2264	0.2402	0.254	0.2682	0.2822	0.2966
		SEM		0.0012	0.000860233	0.00148324	0.000916515	0.000979796	0.0010198	0.00114018	0.00146287	0.00130384	0.0012	0.00159374	0.00136382	0.00203961	0.00267208	0.00257682	0.00267582	0.00316228	0.00358608	0.00422374	0.00471593	0.00505371	0.00633246	0.00734439	0.00815107	0.00956347	0.0104038	0.0121202	0.0139621	0.0163811	0.017823	0.0196657	0.0219011	0.0236846	0.0253705	0.0273982	0.0288142	0.0308561	0.0315062	0.0332063	0.0348468	0.0358937	0.0379452	0.0401211	0.0417222	0.043696	0.0456033
			D
		AH211 Strep + K 1	D	0.007	0.008	0.007	0.008	0.009	0.008	0.008	0.009	0.011	0.01	0.013	0.012	0.013	0.014	0.015	0.017	0.018	0.019	0.019	0.021	0.024	0.023	0.022	0.025	0.026	0.027	0.029	0.03	0.033	0.035	0.039	0.038	0.041	0.045	0.047	0.05	0.054	0.06	0.063	0.066	0.074	0.078	0.084	0.092	0.102	0.104
		AH211 Strep + K 2	D	0.004	0.005	0.003	0.006	0.005	0.004	0.005	0.008	0.007	0.008	0.01	0.012	0.01	0.012	0.012	0.014	0.014	0.016	0.016	0.018	0.02	0.02	0.02	0.023	0.023	0.026	0.026	0.028	0.028	0.032	0.035	0.035	0.035	0.04	0.041	0.047	0.049	0.053	0.056	0.06	0.067	0.072	0.077	0.082	0.088	0.094
		AH211 Strep + K 3	D	0.005	0.006	0.003	0.006	0.008	0.004	0.005	0.006	0.008	0.009	0.009	0.012	0.011	0.012	0.013	0.015	0.016	0.015	0.016	0.02	0.021	0.02	0.018	0.02	0.023	0.024	0.026	0.027	0.027	0.032	0.034	0.034	0.035	0.039	0.042	0.045	0.049	0.052	0.055	0.058	0.064	0.068	0.074	0.08	0.086	0.091
		AH211 Strep + K 4	D	0.004	0.006	0.006	0.005	0.006	0.007	0.006	0.009	0.009	0.011	0.012	0.011	0.014	0.016	0.015	0.016	0.016	0.018	0.019	0.021	0.021	0.022	0.022	0.023	0.024	0.023	0.025	0.026	0.027	0.026	0.028	0.029	0.029	0.031	0.033	0.032	0.034	0.036	0.036	0.037	0.038	0.039	0.044	0.044	0.045	0.047
		AH211 Strep + K 5	D	0.011	0.01	0.012	0.01	0.011	0.011	0.012	0.014	0.014	0.017	0.017	0.017	0.02	0.021	0.022	0.02	0.022	0.022	0.024	0.027	0.026	0.029	0.027	0.03	0.031	0.032	0.033	0.035	0.037	0.035	0.037	0.039	0.041	0.042	0.044	0.044	0.046	0.048	0.05	0.052	0.053	0.06	0.062	0.062	0.067	0.068
		Strep + K Average		0.0062	0.007	0.0062	0.007	0.0078	0.0068	0.0072	0.0092	0.0098	0.011	0.0122	0.0128	0.0136	0.015	0.0154	0.0164	0.0172	0.018	0.0188	0.0214	0.0224	0.0228	0.0218	0.0242	0.0254	0.0264	0.0278	0.0292	0.0304	0.032	0.0346	0.035	0.0362	0.0394	0.0414	0.0436	0.0464	0.0498	0.052	0.0546	0.0592	0.0634	0.0682	0.072	0.0776	0.0808
		SEM		0.00131909	0.000894427	0.00165529	0.000894427	0.00106771	0.00131909	0.00131909	0.00131909	0.00124097	0.00158114	0.00139284	0.00106771	0.00174929	0.00167332	0.00174929	0.00102956	0.00135647	0.00122474	0.00146287	0.00150333	0.0011225	0.00165529	0.00149666	0.00165529	0.00150333	0.00156844	0.00146287	0.00159374	0.00198997	0.00164317	0.00186011	0.00176068	0.00224499	0.00233666	0.00233666	0.00307571	0.00335559	0.00395474	0.00450555	0.00493559	0.00628808	0.00676461	0.00701712	0.00850882	0.00987218	0.0103024
[truncated: 115 more columns]

## Sheet: AH204 Blank Corrected
Well Row	Well Col	Content	Group	Blank corrected based on Raw Data (A-595)	Blank corrected based on Raw Data (A-595)	Blank corrected based on Raw Data (A-595)	Blank corrected based on Raw Data (A-595)	Blank corrected based on Raw Data (A-595)	Blank corrected based on Raw Data (A-595)	Blank corrected based on Raw Data (A-595)	Blank corrected based on Raw Data (A-595)	Blank corrected based on Raw Data (A-595)	Blank corrected based on Raw Data (A-595)	Blank corrected based on Raw Data (A-595)	Blank corrected based on Raw Data (A-595)	Blank corrected based on Raw Data (A-595)	Blank corrected based on Raw Data (A-595)	Blank corrected based on Raw Data (A-595)	Blank corrected based on Raw Data (A-595)	Blank corrected based on Raw Data (A-595)	Blank corrected based on Raw Data (A-595)	Blank corrected based on Raw Data (A-595)	Blank corrected based on Raw Data (A-595)	Blank corrected based on Raw Data (A-595)	Blank corrected based on Raw Data (A-595)	Blank corrected based on Raw Data (A-595)	Blank corrected based on Raw Data (A-595)	Blank corrected based on Raw Data (A-595)	Blank corrected based on Raw Data (A-595)	Blank corrected based on Raw Data (A-595)	Blank corrected based on Raw Data (A-595)	Blank corrected based on Raw Data (A-595)	Blank corrected based on Raw Data (A-595)	Blank corrected based on Raw Data (A-595)	Blank corrected based on Raw Data (A-595)	Blank corrected based on Raw Data (A-595)	Blank corrected based on Raw Data (A-595)	Blank corrected based on Raw Data (A-595)	Blank corrected based on Raw Data (A-595)	Blank corrected based on Raw Data (A-595)	Blank corrected based on Raw Data (A-595)	Blank corrected based on Raw Data (A-595)	Blank corrected based on Raw Data (A-595)	Blank corrected based on Raw Data (A-595)	Blank corrected based on Raw Data (A-595)	Blank corrected based on Raw Data (A-595)	Blank corrected based on Raw Data (A-595)	Blank corrected based on Raw Data (A-595)	Blank corrected based on Raw Data (A-595)
		Time		0 h	0 h 6 min	0 h 12 min	0 h 18 min	0 h 24 min	0 h 30 min	0 h 36 min	0 h 42 min	0 h 48 min	0 h 54 min	1 h	1 h 6 min	1 h 12 min	1 h 18 min	1 h 24 min	1 h 30 min	1 h 36 min	1 h 42 min	1 h 48 min	1 h 54 min	2 h	2 h 6 min	2 h 12 min	2 h 18 min	2 h 24 min	2 h 30 min	2 h 36 min	2 h 42 min	2 h 48 min	2 h 54 min	3 h	3 h 6 min	3 h 12 min	3 h 18 min	3 h 24 min	3 h 30 min	3 h 36 min	3 h 42 min	3 h 48 min	3 h 54 min	4 h	4 h 6 min	4 h 12 min	4 h 18 min	4 h 24 min	4 h 30 min
A	1	Time (Hrs)	A	0										1										2										3										4
A	2	LB 1	A	0.003	0.004	0.004	0.004	0.005	0.005	0.006	0.008	0.01	0.012	0.015	0.017	0.022	0.026	0.029	0.036	0.044	0.05	0.06	0.07	0.081	0.096	0.111	0.132	0.154	0.173	0.191	0.218	0.246	0.269	0.289	0.311	0.335	0.364	0.388	0.411	0.436	0.46	0.489	0.512	0.536	0.559	0.582	0.601	0.619	0.636
A	3	LB 2	A	-0.002	-0.002	-0.004	-0.002	-0.002	-0.001	0.0002	0.001	0.003	0.007	0.007	0.011	0.016	0.019	0.021	0.028	0.035	0.042	0.05	0.062	0.072	0.085	0.101	0.123	0.142	0.165	0.182	0.2	0.227	0.256	0.271	0.292	0.316	0.343	0.368	0.394	0.419	0.443	0.47	0.496	0.523	0.546	0.565	0.586	0.606	0.621
A	4	LB 3	A	-0.001	0.002	0.0006	0.002	0.004	0.004	0.004	0.005	0.009	0.013	0.015	0.017	0.022	0.024	0.028	0.035	0.042	0.05	0.061	0.071	0.082	0.098	0.115	0.137	0.158	0.18	0.199	0.224	0.255	0.273	0.295	0.317	0.342	0.37	0.395	0.418	0.441	0.464	0.492	0.513	0.537	0.559	0.584	0.601	0.62	0.636
A	5	LB 4	A	0.006	0.007	0.008	0.007	0.005	0.006	0.008	0.01	0.011	0.014	0.015	0.018	0.02	0.022	0.027	0.032	0.036	0.041	0.047	0.052	0.06	0.069	0.079	0.089	0.101	0.115	0.131	0.15	0.169	0.186	0.203	0.224	0.248	0.274	0.29	0.307	0.33	0.355	0.379	0.403	0.426	0.45	0.471	0.495	0.517	0.547
A	6	LB 5	A	0.006	0.007	0.008	0.007	0.007	0.005	0.01	0.01	0.013	0.015	0.019	0.021	0.024	0.027	0.034	0.041	0.045	0.054	0.064	0.074	0.085	0.1	0.117	0.136	0.156	0.179	0.199	0.21	0.235	0.267	0.285	0.305	0.329	0.353	0.38	0.405	0.431	0.459	0.484	0.51	0.542	0.572	0.59	0.608	0.625	0.646
		LB Average		0.0024	0.0036	0.00332	0.0036	0.0038	0.0038	0.00564	0.0068	0.0092	0.0122	0.0142	0.0168	0.0208	0.0236	0.0278	0.0344	0.0404	0.0474	0.0564	0.0658	0.076	0.0896	0.1046	0.1234	0.1422	0.1624	0.1804	0.2004	0.2264	0.2502	0.2686	0.2898	0.314	0.3408	0.3642	0.387	0.4114	0.4362	0.4628	0.4868	0.5128	0.5372	0.5584	0.5782	0.5974	0.6172
		SEM		0.00169115	0.00169115	0.00229399	0.00169115	0.00152971	0.00124097	0.00168808	0.00171464	0.00168523	0.00139284	0.00195959	0.00162481	0.00135647	0.00143527	0.00208327	0.0021587	0.00206398	0.0025219	0.00332566	0.00397995	0.00454973	0.00576715	0.0069685	0.00894763	0.0106696	0.0121474	0.0127421	0.0132272	0.0151182	0.0162954	0.0168689	0.0169629	0.0170441	0.0173303	0.0190851	0.0203838	0.0206751	0.0206141	0.0212871	0.021174	0.0219258	0.0221842	0.022241	0.0211078	0.0203435	0.0179983
B	1		B
B	2	Kamba 1	B	0.005	0.005	0.005	0.005	0.006	0.007	0.008	0.009	0.009	0.01	0.013	0.014	0.015	0.02	0.021	0.023	0.026	0.031	0.032	0.036	0.04	0.045	0.052	0.059	0.064	0.072	0.082	0.094	0.102	0.116	0.129	0.139	0.152	0.162	0.175	0.187	0.201	0.21	0.224	0.235	0.248	0.259	0.275	0.293	0.31	0.326
B	3	Kamba 2	B	0.005	0.005	0.005	0.004	0.005	0.006	0.008	0.008	0.009	0.012	0.013	0.016	0.016	0.021	0.021	0.024	0.028	0.033	0.035	0.038	0.042	0.049	0.055	0.063	0.068	0.078	0.09	0.1	0.111	0.125	0.138	0.149	0.164	0.175	0.189	0.203	0.216	0.227	0.241	0.252	0.269	0.283	0.301	0.319	0.337	0.354
B	4	Kamba 3	B	0.001	0.001	0.002	0.001	0.003	0.003	0.003	0.005	0.007	0.008	0.01	0.012	0.014	0.019	0.022	0.024	0.029	0.032	0.038	0.043	0.048	0.056	0.065	0.076	0.084	0.095	0.109	0.124	0.139	0.155	0.169	0.183	0.201	0.215	0.231	0.243	0.259	0.274	0.291	0.309	0.328	0.346	0.365	0.383	0.399	0.415
B	5	Kamba 4	B	0.006	0.005	0.004	0.005	0.005	0.005	0.005	0.006	0.008	0.009	0.011	0.013	0.015	0.017	0.016	0.021	0.023	0.028	0.029	0.034	0.037	0.04	0.045	0.049	0.055	0.06	0.066	0.072	0.082	0.091	0.1	0.112	0.124	0.136	0.15	0.161	0.173	0.185	0.198	0.212	0.224	0.238	0.25	0.262	0.273	0.29
B	6	Kamba 5	B	0.005	0.003	0.002	0.0007	0.005	0.004	0.005	0.008	0.007	0.01	0.012	0.014	0.016	0.02	0.02	0.024	0.028	0.033	0.035	0.041	0.045	0.051	0.058	0.065	0.074	0.084	0.094	0.105	0.121	0.135	0.15	0.165	0.176	0.194	0.21	0.226	0.241	0.253	0.268	0.283	0.299	0.318	0.336	0.354	0.37	0.387
		Kamba Average		0.0044	0.0038	0.0036	0.00314	0.0048	0.005	0.0058	0.0072	0.008	0.0098	0.0118	0.0138	0.0152	0.0194	0.02	0.0232	0.0268	0.0314	0.0338	0.0384	0.0424	0.0482	0.055	0.0624	0.069	0.0778	0.0882	0.099	0.111	0.1244	0.1372	0.1496	0.1634	0.1764	0.191	0.204	0.218	0.2298	0.2444	0.2582	0.2736	0.2888	0.3054	0.3222	0.3378	0.3544
		SEM		0.00087178	0.0008	0.000678233	0.00095373	0.000489898	0.000707107	0.000969536	0.000734847	0.000447214	0.000663325	0.000583095	0.000663325	0.000374166	0.000678233	0.00104881	0.000583095	0.00106771	0.000927362	0.00152971	0.00163095	0.00191311	0.00270924	0.00330151	0.00437721	0.00485798	0.0058515	0.0070739	0.00841427	0.00950263	0.0105717	0.0114604	0.0119983	0.0127577	0.013493	0.0139678	0.0143944	0.0150466	0.0156506	0.0162929	0.0171855	0.0183592	0.0195279	0.020617	0.0214415	0.0220848	0.0220105
C	1		C
C	2	Strep 1	C	0.0006	0.001	0.003	0.001	0.003	0.003	0.005	0.006	0.007	0.01	0.016	0.017	0.02	0.022	0.028	0.033	0.039	0.046	0.054	0.065	0.076	0.089	0.105	0.122	0.144	0.166	0.186	0.206	0.235	0.264	0.279	0.302	0.326	0.353	0.379	0.407	0.428	0.453	0.481	0.505	0.53	0.553	0.573	0.598	0.615	0.633
C	3	Strep 2	C	0.0006	0.0001	0.002	0.0003	0.002	0.003	0.005	0.006	0.008	0.009	0.014	0.015	0.02	0.022	0.028	0.034	0.038	0.046	0.053	0.065	0.077	0.089	0.106	0.125	0.147	0.169	0.186	0.205	0.229	0.259	0.271	0.294	0.317	0.342	0.368	0.398	0.419	0.446	0.47	0.497	0.526	0.547	0.566	0.588	0.605	0.622
C	4	Strep 3	C	-0.003	0.0008	0.001	0	0.001	0.002	0.003	0.004	0.007	0.009	0.013	0.014	0.02	0.021	0.027	0.032	0.04	0.047	0.056	0.067	0.078	0.093	0.109	0.129	0.151	0.173	0.193	0.215	0.245	0.272	0.286	0.31	0.335	0.362	0.386	0.412	0.436	0.462	0.487	0.512	0.534	0.557	0.579	0.602	0.619	0.636
C	5	Strep 4	C	0.002	0.003	0.004	0.005	0.004	0.005	0.006	0.008	0.009	0.009	0.013	0.015	0.018	0.021	0.024	0.028	0.033	0.038	0.044	0.047	0.056	0.063	0.072	0.082	0.095	0.108	0.12	0.14	0.158	0.176	0.192	0.211	0.231	0.258	0.28	0.295	0.317	0.338	0.364	0.389	0.413	0.441	0.462	0.484	0.507	0.534
C	6	Strep 5	C	0.003	0.004	0.003	0.004	0.005	0.008	0.007	0.01	0.009	0.012	0.016	0.017	0.021	0.027	0.029	0.036	0.043	0.049	0.059	0.068	0.08	0.092	0.107	0.124	0.145	0.166	0.187	0.204	0.22	0.25	0.277	0.293	0.313	0.337	0.364	0.393	0.419	0.441	0.47	0.496	0.524	0.558	0.583	0.598	0.615	0.64
		Strep Average		0.00064	0.00178	0.0026	0.00206	0.003	0.0042	0.0052	0.0068	0.008	0.0098	0.0144	0.0156	0.0198	0.0226	0.0272	0.0326	0.0386	0.0452	0.0532	0.0624	0.0734	0.0852	0.0998	0.1164	0.1364	0.1564	0.1744	0.194	0.2174	0.2442	0.261	0.282	0.3044	0.3304	0.3554	0.381	0.4038	0.428	0.4544	0.4798	0.5054	0.5312	0.5526	0.574	0.5922	0.613
		SEM		0.00101666	0.000735119	0.000509902	0.00102157	0.000707107	0.00106771	0.000663325	0.0010198	0.000447214	0.000583095	0.000678233	0.0006	0.000489898	0.0011225	0.000860233	0.00132665	0.00163095	0.00188149	0.00251794	0.00389358	0.0044	0.00560714	0.0069814	0.00867525	0.0104192	0.012168	0.0136624	0.0136418	0.0153968	0.0174195	0.0174155	0.0180139	0.0187393	0.0186134	0.0192499	0.0217555	0.0219303	0.022775	0.0228355	0.0228854	0.0231638	0.0226327	0.0228311	0.0226186	0.0214252	0.019975
D	1		D
D	2	Strep + K 1	D	0.007	0.006	0.008	0.006	0.008	0.009	0.007	0.01	0.01	0.012	0.014	0.014	0.018	0.022	0.024	0.024	0.029	0.033	0.038	0.042	0.047	0.054	0.058	0.065	0.076	0.084	0.096	0.108	0.122	0.136	0.148	0.162	0.175	0.19	0.206	0.218	0.232	0.245	0.258	0.273	0.287	0.306	0.325	0.343	0.361	0.378
D	3	Strep + K 2	D	0.001	0.005	0.004	0.003	0.004	0.005	0.005	0.006	0.007	0.009	0.009	0.011	0.015	0.017	0.02	0.022	0.025	0.028	0.032	0.038	0.041	0.045	0.049	0.058	0.063	0.071	0.079	0.09	0.101	0.112	0.125	0.139	0.151	0.163	0.175	0.188	0.203	0.217	0.229	0.242	0.252	0.266	0.282	0.296	0.312	0.329
D	4	Strep + K 3	D	0.003	0.008	0.008	0.007	0.008	0.007	0.008	0.011	0.011	0.012	0.015	0.015	0.02	0.023	0.024	0.026	0.031	0.034	0.04	0.045	0.048	0.055	0.062	0.069	0.078	0.087	0.098	0.109	0.123	0.135	0.149	0.162	0.174	0.188	0.202	0.215	0.228	0.239	0.25	0.265	0.277	0.295	0.311	0.329	0.348	0.365
D	5	Strep + K 4	D	0.003	0.003	0	0.003	0.004	0.003	0.002	0.003	0.005	0.006	0.007	0.008	0.008	0.008	0.01	0.011	0.013	0.014	0.016	0.018	0.02	0.02	0.02	0.023	0.025	0.029	0.031	0.033	0.034	0.039	0.042	0.044	0.047	0.052	0.056	0.061	0.064	0.073	0.076	0.082	0.089	0.096	0.102	0.111	0.119	0.126
D	6	Strep + K 5	D	0.007	0.007	0.005	0.007	0.008	0.007	0.008	0.009	0.012	0.012	0.014	0.015	0.016	0.019	0.021	0.024	0.027	0.029	0.033	0.036	0.04	0.041	0.047	0.051	0.056	0.063	0.071	0.076	0.084	0.095	0.107	0.115	0.125	0.139	0.149	0.161	0.173	0.185	0.199	0.213	0.227	0.238	0.25	0.262	0.271	0.285
		Strep + K Average		0.0042	0.0058	0.005	0.0052	0.0064	0.0062	0.006	0.0078	0.009	0.0102	0.0118	0.0126	0.0154	0.0178	0.0198	0.0214	0.025	0.0276	0.0318	0.0358	0.0392	0.043	0.0472	0.0532	0.0596	0.0668	0.075	0.0832	0.0928	0.1034	0.1142	0.1244	0.1344	0.1464	0.1576	0.1686	0.18	0.1918	0.2024	0.215	0.2264	0.2402	0.254	0.2682	0.2822	0.2966
		SEM		0.0012	0.000860233	0.00148324	0.000916515	0.000979796	0.0010198	0.00114018	0.00146287	0.00130384	0.0012	0.00159374	0.00136382	0.00203961	0.00267208	0.00257682	0.00267582	0.00316228	0.00358608	0.00422374	0.00471593	0.00505371	0.00633246	0.00734439	0.00815107	0.00956347	0.0104038	0.0121202	0.0139621	0.0163811	0.017823	0.0196657	0.0219011	0.0236846	0.0253705	0.0273982	0.0288142	0.0308561	0.0315062	0.0332063	0.0348468	0.0358937	0.0379452	0.0401211	0.0417222	0.043696	0.0456033
[truncated: 115 more columns]

## Sheet: AH204 Raw Data
Well Row	Well Col	Content	Group	Raw Data (A-595)	Raw Data (A-595)	Raw Data (A-595)	Raw Data (A-595)	Raw Data (A-595)	Raw Data (A-595)	Raw Data (A-595)	Raw Data (A-595)	Raw Data (A-595)	Raw Data (A-595)	Raw Data (A-595)	Raw Data (A-595)	Raw Data (A-595)	Raw Data (A-595)	Raw Data (A-595)	Raw Data (A-595)	Raw Data (A-595)	Raw Data (A-595)	Raw Data (A-595)	Raw Data (A-595)	Raw Data (A-595)	Raw Data (A-595)	Raw Data (A-595)	Raw Data (A-595)	Raw Data (A-595)	Raw Data (A-595)	Raw Data (A-595)	Raw Data (A-595)	Raw Data (A-595)	Raw Data (A-595)	Raw Data (A-595)	Raw Data (A-595)	Raw Data (A-595)	Raw Data (A-595)	Raw Data (A-595)	Raw Data (A-595)	Raw Data (A-595)	Raw Data (A-595)	Raw Data (A-595)	Raw Data (A-595)	Raw Data (A-595)	Raw Data (A-595)	Raw Data (A-595)	Raw Data (A-595)	Raw Data (A-595)	Raw Data (A-595)
		Time		0 h	0 h 6 min	0 h 12 min	0 h 18 min	0 h 24 min	0 h 30 min	0 h 36 min	0 h 42 min	0 h 48 min	0 h 54 min	1 h	1 h 6 min	1 h 12 min	1 h 18 min	1 h 24 min	1 h 30 min	1 h 36 min	1 h 42 min	1 h 48 min	1 h 54 min	2 h	2 h 6 min	2 h 12 min	2 h 18 min	2 h 24 min	2 h 30 min	2 h 36 min	2 h 42 min	2 h 48 min	2 h 54 min	3 h	3 h 6 min	3 h 12 min	3 h 18 min	3 h 24 min	3 h 30 min	3 h 36 min	3 h 42 min	3 h 48 min	3 h 54 min	4 h	4 h 6 min	4 h 12 min	4 h 18 min	4 h 24 min	4 h 30 min
A	1	Blank B	A	0.211	0.204	0.202	0.201	0.2	0.198	0.2	0.199	0.199	0.197	0.197	0.197	0.195	0.196	0.196	0.195	0.195	0.196	0.195	0.194	0.196	0.195	0.196	0.194	0.194	0.195	0.194	0.193	0.194	0.194	0.194	0.193	0.194	0.192	0.194	0.194	0.194	0.195	0.192	0.194	0.193	0.192	0.192	0.193	0.192	0.193
A	2	LB 1	A	0.214	0.208	0.207	0.205	0.205	0.204	0.205	0.206	0.209	0.209	0.212	0.214	0.217	0.222	0.225	0.231	0.239	0.246	0.255	0.264	0.276	0.291	0.307	0.326	0.347	0.369	0.385	0.411	0.439	0.464	0.482	0.504	0.529	0.555	0.581	0.605	0.63	0.654	0.681	0.706	0.729	0.751	0.774	0.794	0.811	0.829
A	3	LB 2	A	0.209	0.202	0.198	0.199	0.198	0.197	0.2	0.2	0.202	0.205	0.204	0.209	0.211	0.215	0.217	0.223	0.231	0.238	0.245	0.255	0.268	0.281	0.297	0.317	0.336	0.36	0.376	0.393	0.421	0.45	0.464	0.485	0.51	0.534	0.562	0.588	0.613	0.638	0.662	0.69	0.716	0.739	0.757	0.78	0.798	0.814
A	4	LB 3	A	0.21	0.206	0.203	0.203	0.203	0.202	0.204	0.204	0.207	0.21	0.212	0.214	0.217	0.22	0.225	0.23	0.237	0.246	0.256	0.265	0.278	0.293	0.311	0.331	0.352	0.375	0.393	0.417	0.449	0.467	0.488	0.51	0.536	0.561	0.589	0.612	0.635	0.659	0.684	0.707	0.73	0.751	0.776	0.794	0.812	0.828
		Blank B		0.207	0.202	0.199	0.198	0.198	0.2	0.197	0.197	0.196	0.196	0.196	0.196	0.196	0.198	0.196	0.194	0.196	0.195	0.195	0.195	0.197	0.195	0.194	0.195	0.195	0.195	0.196	0.195	0.195	0.194	0.197	0.195	0.193	0.195	0.195	0.196	0.195	0.193	0.195	0.195	0.195	0.194	0.194	0.193	0.194	0.194
A	5	LB 4	A	0.212	0.209	0.207	0.205	0.203	0.205	0.206	0.207	0.207	0.21	0.211	0.214	0.216	0.219	0.223	0.226	0.232	0.236	0.242	0.247	0.257	0.263	0.272	0.284	0.296	0.31	0.327	0.345	0.364	0.38	0.4	0.418	0.441	0.469	0.484	0.503	0.525	0.548	0.573	0.598	0.621	0.644	0.665	0.688	0.711	0.741
A	6	LB 5	A	0.212	0.209	0.206	0.205	0.205	0.205	0.207	0.207	0.209	0.212	0.215	0.217	0.22	0.225	0.229	0.234	0.241	0.249	0.259	0.268	0.282	0.295	0.311	0.331	0.351	0.374	0.394	0.406	0.43	0.461	0.482	0.5	0.522	0.547	0.575	0.601	0.626	0.652	0.678	0.704	0.737	0.767	0.784	0.8	0.819	0.84
B	1	Blank B	B	0.204	0.198	0.197	0.197	0.195	0.193	0.194	0.193	0.195	0.194	0.194	0.194	0.194	0.192	0.193	0.194	0.194	0.193	0.194	0.194	0.194	0.194	0.192	0.192	0.194	0.194	0.192	0.193	0.194	0.193	0.193	0.194	0.193	0.193	0.194	0.193	0.193	0.194	0.192	0.194	0.19	0.193	0.192	0.192	0.192	0.193
B	2	Kamba 1	B	0.209	0.203	0.202	0.202	0.201	0.2	0.202	0.202	0.204	0.204	0.206	0.208	0.209	0.212	0.214	0.217	0.22	0.224	0.225	0.23	0.234	0.238	0.244	0.251	0.257	0.266	0.275	0.286	0.296	0.309	0.322	0.333	0.344	0.355	0.368	0.381	0.394	0.404	0.416	0.428	0.438	0.453	0.468	0.485	0.502	0.519
B	3	Kamba 2	B	0.208	0.203	0.203	0.201	0.2	0.199	0.202	0.201	0.204	0.205	0.207	0.21	0.21	0.213	0.214	0.219	0.222	0.225	0.229	0.232	0.236	0.243	0.247	0.255	0.262	0.271	0.282	0.292	0.304	0.317	0.331	0.343	0.356	0.368	0.383	0.396	0.409	0.421	0.433	0.446	0.459	0.476	0.493	0.511	0.529	0.547
B	4	Kamba 3	B	0.205	0.2	0.199	0.198	0.198	0.196	0.197	0.198	0.202	0.202	0.204	0.206	0.208	0.211	0.215	0.219	0.223	0.225	0.231	0.236	0.242	0.25	0.257	0.268	0.277	0.289	0.301	0.316	0.333	0.347	0.361	0.376	0.394	0.408	0.425	0.437	0.452	0.467	0.483	0.503	0.519	0.539	0.558	0.575	0.591	0.608
		Blank B		0.208	0.202	0.201	0.199	0.195	0.198	0.197	0.195	0.196	0.197	0.197	0.196	0.195	0.195	0.196	0.195	0.196	0.195	0.195	0.195	0.196	0.195	0.194	0.194	0.195	0.195	0.195	0.196	0.195	0.195	0.196	0.194	0.194	0.195	0.195	0.195	0.195	0.195	0.194	0.194	0.195	0.194	0.193	0.193	0.194	0.194
B	5	Kamba 4	B	0.213	0.207	0.204	0.203	0.201	0.202	0.202	0.201	0.203	0.206	0.207	0.209	0.209	0.212	0.213	0.215	0.219	0.223	0.224	0.229	0.233	0.235	0.24	0.243	0.25	0.255	0.261	0.268	0.278	0.286	0.296	0.307	0.318	0.331	0.345	0.356	0.368	0.379	0.392	0.406	0.419	0.432	0.443	0.455	0.467	0.484
B	6	Kamba 5	B	0.213	0.205	0.203	0.199	0.201	0.202	0.202	0.203	0.203	0.207	0.209	0.21	0.211	0.215	0.217	0.219	0.225	0.228	0.23	0.235	0.241	0.246	0.253	0.26	0.269	0.279	0.289	0.301	0.316	0.33	0.346	0.359	0.37	0.388	0.405	0.421	0.435	0.448	0.462	0.477	0.495	0.511	0.529	0.547	0.564	0.581
C	1	Blank B	C	0.213	0.206	0.203	0.204	0.202	0.2	0.201	0.2	0.201	0.199	0.198	0.2	0.198	0.2	0.198	0.199	0.199	0.199	0.2	0.199	0.199	0.2	0.198	0.198	0.197	0.198	0.197	0.197	0.197	0.197	0.199	0.197	0.198	0.196	0.198	0.197	0.199	0.198	0.197	0.198	0.197	0.196	0.197	0.197	0.198	0.198
C	2	Strep 1	C	0.214	0.207	0.206	0.205	0.205	0.203	0.206	0.206	0.208	0.209	0.213	0.216	0.218	0.222	0.227	0.232	0.238	0.245	0.253	0.263	0.275	0.288	0.303	0.32	0.342	0.364	0.383	0.404	0.433	0.461	0.478	0.499	0.524	0.549	0.578	0.603	0.627	0.651	0.679	0.703	0.727	0.749	0.77	0.795	0.813	0.83
C	3	Strep 2	C	0.214	0.206	0.205	0.204	0.204	0.203	0.205	0.205	0.208	0.208	0.212	0.215	0.218	0.222	0.226	0.232	0.238	0.246	0.253	0.264	0.276	0.289	0.305	0.323	0.344	0.367	0.384	0.402	0.427	0.456	0.471	0.491	0.515	0.539	0.567	0.594	0.618	0.644	0.667	0.695	0.723	0.744	0.763	0.785	0.803	0.82
C	4	Strep 3	C	0.211	0.206	0.204	0.204	0.203	0.202	0.204	0.204	0.208	0.208	0.211	0.214	0.218	0.221	0.225	0.231	0.239	0.247	0.256	0.265	0.277	0.293	0.307	0.327	0.349	0.371	0.39	0.413	0.443	0.469	0.485	0.506	0.534	0.558	0.585	0.609	0.634	0.66	0.684	0.71	0.731	0.754	0.776	0.799	0.817	0.833
		Blank B		0.212	0.207	0.206	0.202	0.203	0.202	0.202	0.201	0.201	0.202	0.201	0.201	0.199	0.201	0.2	0.2	0.2	0.2	0.199	0.199	0.2	0.199	0.2	0.2	0.199	0.198	0.199	0.199	0.2	0.199	0.2	0.199	0.199	0.199	0.2	0.199	0.199	0.201	0.198	0.199	0.199	0.198	0.197	0.198	0.198	0.198
C	5	Strep 4	C	0.215	0.21	0.209	0.207	0.207	0.207	0.207	0.209	0.209	0.211	0.214	0.216	0.217	0.222	0.224	0.228	0.233	0.238	0.243	0.247	0.256	0.262	0.272	0.282	0.294	0.307	0.32	0.339	0.358	0.374	0.392	0.41	0.43	0.458	0.48	0.494	0.515	0.539	0.562	0.588	0.612	0.638	0.659	0.682	0.705	0.732
C	6	Strep 5	C	0.216	0.211	0.209	0.206	0.207	0.209	0.209	0.211	0.21	0.214	0.217	0.218	0.22	0.228	0.229	0.235	0.244	0.249	0.257	0.268	0.28	0.292	0.307	0.324	0.344	0.364	0.387	0.403	0.42	0.448	0.476	0.492	0.512	0.537	0.564	0.592	0.618	0.642	0.668	0.695	0.723	0.756	0.78	0.797	0.812	0.839
D	1	Blank B	D	0.202	0.194	0.193	0.194	0.193	0.191	0.193	0.191	0.193	0.191	0.191	0.193	0.191	0.19	0.19	0.192	0.192	0.191	0.19	0.189	0.19	0.189	0.191	0.191	0.19	0.191	0.19	0.19	0.19	0.191	0.191	0.19	0.191	0.189	0.189	0.191	0.191	0.191	0.19	0.191	0.191	0.189	0.189	0.19	0.189	0.19
D	2	Strep + K 1	D	0.209	0.201	0.2	0.2	0.201	0.2	0.2	0.202	0.203	0.203	0.205	0.207	0.209	0.211	0.214	0.216	0.221	0.224	0.228	0.231	0.237	0.243	0.249	0.256	0.266	0.275	0.286	0.298	0.312	0.326	0.339	0.352	0.366	0.38	0.395	0.409	0.423	0.435	0.449	0.463	0.478	0.494	0.514	0.533	0.551	0.567
D	3	Strep + K 2	D	0.203	0.199	0.197	0.197	0.197	0.196	0.198	0.197	0.2	0.2	0.201	0.204	0.206	0.207	0.21	0.214	0.216	0.22	0.222	0.226	0.231	0.235	0.24	0.249	0.253	0.262	0.269	0.28	0.29	0.302	0.316	0.329	0.342	0.352	0.364	0.379	0.394	0.407	0.419	0.432	0.443	0.455	0.471	0.487	0.501	0.519
D	4	Strep + K 3	D	0.205	0.202	0.2	0.2	0.2	0.199	0.201	0.202	0.204	0.203	0.206	0.208	0.211	0.213	0.214	0.218	0.223	0.226	0.231	0.234	0.238	0.244	0.253	0.26	0.268	0.278	0.287	0.298	0.313	0.326	0.34	0.352	0.365	0.378	0.391	0.405	0.418	0.429	0.44	0.456	0.468	0.484	0.5	0.519	0.537	0.554
		Blank B		0.203	0.198	0.197	0.194	0.192	0.194	0.194	0.192	0.192	0.193	0.193	0.192	0.191	0.193	0.192	0.191	0.192	0.192	0.191	0.19	0.191	0.191	0.192	0.192	0.192	0.19	0.191	0.192	0.193	0.191	0.19	0.192	0.192	0.191	0.192	0.191	0.191	0.19	0.19	0.191	0.191	0.191	0.191	0.19	0.191	0.192
D	5	Strep + K 4	D	0.205	0.2	0.197	0.197	0.195	0.197	0.196	0.195	0.196	0.198	0.2	0.201	0.199	0.202	0.202	0.202	0.206	0.205	0.207	0.208	0.211	0.211	0.212	0.215	0.217	0.219	0.222	0.225	0.228	0.23	0.233	0.236	0.239	0.243	0.248	0.252	0.256	0.262	0.267	0.273	0.28	0.287	0.293	0.3	0.31	0.317
D	6	Strep + K 5	D	0.209	0.205	0.202	0.2	0.2	0.202	0.202	0.202	0.204	0.205	0.206	0.207	0.207	0.212	0.213	0.214	0.219	0.221	0.224	0.226	0.231	0.232	0.239	0.243	0.248	0.254	0.262	0.268	0.277	0.286	0.297	0.307	0.317	0.33	0.341	0.352	0.364	0.375	0.389	0.404	0.418	0.429	0.441	0.451	0.462	0.476
[truncated: 115 more columns]

## Sheet: AH211 Blank Corrected
Well Row	Well Col	Content	Group	Blank corrected based on Raw Data (A-595)	Blank corrected based on Raw Data (A-595)	Blank corrected based on Raw Data (A-595)	Blank corrected based on Raw Data (A-595)	Blank corrected based on Raw Data (A-595)	Blank corrected based on Raw Data (A-595)	Blank corrected based on Raw Data (A-595)	Blank corrected based on Raw Data (A-595)	Blank corrected based on Raw Data (A-595)	Blank corrected based on Raw Data (A-595)	Blank corrected based on Raw Data (A-595)	Blank corrected based on Raw Data (A-595)	Blank corrected based on Raw Data (A-595)	Blank corrected based on Raw Data (A-595)	Blank corrected based on Raw Data (A-595)	Blank corrected based on Raw Data (A-595)	Blank corrected based on Raw Data (A-595)	Blank corrected based on Raw Data (A-595)	Blank corrected based on Raw Data (A-595)	Blank corrected based on Raw Data (A-595)	Blank corrected based on Raw Data (A-595)	Blank corrected based on Raw Data (A-595)	Blank corrected based on Raw Data (A-595)	Blank corrected based on Raw Data (A-595)	Blank corrected based on Raw Data (A-595)	Blank corrected based on Raw Data (A-595)	Blank corrected based on Raw Data (A-595)	Blank corrected based on Raw Data (A-595)	Blank corrected based on Raw Data (A-595)	Blank corrected based on Raw Data (A-595)	Blank corrected based on Raw Data (A-595)	Blank corrected based on Raw Data (A-595)	Blank corrected based on Raw Data (A-595)	Blank corrected based on Raw Data (A-595)	Blank corrected based on Raw Data (A-595)	Blank corrected based on Raw Data (A-595)	Blank corrected based on Raw Data (A-595)	Blank corrected based on Raw Data (A-595)	Blank corrected based on Raw Data (A-595)	Blank corrected based on Raw Data (A-595)	Blank corrected based on Raw Data (A-595)	Blank corrected based on Raw Data (A-595)	Blank corrected based on Raw Data (A-595)	Blank corrected based on Raw Data (A-595)	Blank corrected based on Raw Data (A-595)	Blank corrected based on Raw Data (A-595)
		Time		0 h	0 h 6 min	0 h 12 min	0 h 18 min	0 h 24 min	0 h 30 min	0 h 36 min	0 h 42 min	0 h 48 min	0 h 54 min	1 h	1 h 6 min	1 h 12 min	1 h 18 min	1 h 24 min	1 h 30 min	1 h 36 min	1 h 42 min	1 h 48 min	1 h 54 min	2 h	2 h 6 min	2 h 12 min	2 h 18 min	2 h 24 min	2 h 30 min	2 h 36 min	2 h 42 min	2 h 48 min	2 h 54 min	3 h	3 h 6 min	3 h 12 min	3 h 18 min	3 h 24 min	3 h 30 min	3 h 36 min	3 h 42 min	3 h 48 min	3 h 54 min	4 h	4 h 6 min	4 h 12 min	4 h 18 min	4 h 24 min	4 h 30 min
A	1	Time (Hrs)	A	0										1										2										3										4
A	2	LB 1	A	0.007	0.006	0.007	0.005	0.005	0.004	0.008	0.009	0.01	0.015	0.019	0.022	0.024	0.028	0.034	0.043	0.048	0.058	0.069	0.081	0.094	0.115	0.136	0.16	0.185	0.198	0.224	0.256	0.281	0.297	0.313	0.335	0.361	0.383	0.403	0.423	0.444	0.466	0.486	0.511	0.531	0.543	0.554	0.565	0.58	0.596
A	3	LB 2	A	0.005	0.002	0.005	0.004	0.004	0.004	0.006	0.007	0.011	0.014	0.019	0.021	0.024	0.03	0.037	0.044	0.052	0.062	0.073	0.088	0.105	0.127	0.151	0.176	0.194	0.212	0.242	0.272	0.287	0.304	0.324	0.349	0.373	0.394	0.416	0.435	0.455	0.478	0.502	0.522	0.537	0.55	0.558	0.578	0.589	0.603
A	4	LB 3	A	0.005	0.006	0.007	0.007	0.006	0.007	0.01	0.011	0.012	0.017	0.021	0.023	0.027	0.031	0.038	0.045	0.053	0.064	0.076	0.09	0.107	0.126	0.151	0.176	0.192	0.21	0.239	0.263	0.279	0.298	0.316	0.34	0.364	0.384	0.405	0.423	0.445	0.465	0.49	0.508	0.52	0.535	0.547	0.564	0.576	0.588
A	5	LB 4	A	0.001	0.003	0.003	0.004	0.005	0.006	0.007	0.009	0.011	0.015	0.021	0.024	0.032	0.037	0.043	0.054	0.064	0.077	0.092	0.11	0.13	0.152	0.179	0.2	0.216	0.243	0.268	0.283	0.304	0.327	0.352	0.375	0.397	0.42	0.445	0.465	0.484	0.5	0.522	0.539	0.554	0.57	0.583	0.594	0.605	0.618
A	6	LB 5	A	0.007	0.007	0.006	0.007	0.007	0.006	0.009	0.01	0.013	0.016	0.021	0.024	0.029	0.034	0.04	0.048	0.056	0.067	0.081	0.094	0.11	0.131	0.154	0.179	0.197	0.215	0.243	0.268	0.284	0.302	0.327	0.35	0.374	0.397	0.418	0.443	0.464	0.484	0.502	0.522	0.54	0.553	0.569	0.582	0.595	0.607
		LB Average		0.005	0.0048	0.0056	0.0054	0.0054	0.0054	0.008	0.0092	0.0114	0.0154	0.0202	0.0228	0.0272	0.032	0.0384	0.0468	0.0546	0.0656	0.0782	0.0926	0.1092	0.1302	0.1542	0.1782	0.1968	0.2156	0.2432	0.2684	0.287	0.3056	0.3264	0.3498	0.3738	0.3956	0.4174	0.4378	0.4584	0.4786	0.5004	0.5204	0.5364	0.5502	0.5622	0.5766	0.589	0.6024
		SEM		0.00109545	0.000969536	0.000748331	0.000678233	0.000509902	0.0006	0.000707107	0.000663325	0.000509902	0.000509902	0.000489898	0.000583095	0.00152971	0.00158114	0.00150333	0.00198494	0.00267582	0.00320312	0.00396737	0.00483322	0.00586003	0.00606135	0.0069527	0.00639062	0.00519038	0.00743371	0.00708096	0.00452327	0.00446094	0.00550091	0.00688912	0.00689493	0.00631981	0.00668281	0.00750067	0.00778717	0.00736614	0.0064467	0.00627375	0.0054461	0.00557315	0.00584294	0.00630397	0.0056	0.00520577	0.00506557
B	1		B
B	2	Kamba 1	B	0.002	0.001	0.002	0.002	0.003	0.003	0.004	0.007	0.006	0.007	0.009	0.011	0.012	0.016	0.017	0.02	0.022	0.024	0.028	0.032	0.037	0.04	0.046	0.051	0.058	0.066	0.074	0.084	0.096	0.108	0.119	0.134	0.145	0.16	0.17	0.185	0.202	0.217	0.231	0.244	0.256	0.268	0.285	0.301	0.315	0.329
B	3	Kamba 2	B	0.002	0.003	0.001	0.002	0.005	0.004	0.005	0.008	0.009	0.01	0.012	0.014	0.017	0.019	0.019	0.024	0.027	0.032	0.035	0.038	0.045	0.05	0.057	0.065	0.074	0.082	0.094	0.105	0.122	0.137	0.149	0.162	0.174	0.192	0.21	0.224	0.237	0.25	0.264	0.279	0.293	0.313	0.327	0.341	0.355	0.368
B	4	Kamba 3	B	0.002	0.002	0.001	0.001	0.005	0.002	0.003	0.006	0.006	0.008	0.01	0.011	0.014	0.018	0.018	0.021	0.023	0.029	0.032	0.034	0.04	0.045	0.051	0.058	0.065	0.072	0.085	0.093	0.107	0.121	0.134	0.148	0.158	0.172	0.188	0.203	0.22	0.233	0.247	0.259	0.27	0.287	0.302	0.319	0.333	0.351
B	5	Kamba 4	B	0.004	0.004	0.005	0.004	0.005	0.006	0.008	0.009	0.01	0.012	0.013	0.016	0.017	0.022	0.022	0.024	0.028	0.032	0.035	0.038	0.043	0.048	0.056	0.062	0.069	0.077	0.088	0.098	0.109	0.123	0.135	0.144	0.156	0.167	0.18	0.193	0.205	0.216	0.227	0.239	0.251	0.261	0.277	0.292	0.308	0.321
B	6	Kamba 5	B	0.008	0.006	0.006	0.005	0.006	0.006	0.009	0.01	0.008	0.011	0.013	0.015	0.017	0.02	0.02	0.023	0.025	0.028	0.03	0.035	0.04	0.044	0.05	0.057	0.062	0.07	0.079	0.09	0.098	0.113	0.124	0.136	0.149	0.159	0.173	0.186	0.201	0.213	0.225	0.235	0.25	0.259	0.276	0.29	0.306	0.322
		Kamba Average		0.0036	0.0032	0.003	0.0028	0.0048	0.0042	0.0058	0.008	0.0078	0.0096	0.0114	0.0134	0.0154	0.019	0.0192	0.0224	0.025	0.029	0.032	0.0354	0.041	0.0454	0.052	0.0586	0.0656	0.0734	0.084	0.094	0.1064	0.1204	0.1322	0.1448	0.1564	0.17	0.1842	0.1982	0.213	0.2258	0.2388	0.2512	0.264	0.2776	0.2934	0.3086	0.3234	0.3382
		SEM		0.00116619	0.000860233	0.00104881	0.000734847	0.000489898	0.0008	0.00115758	0.000707107	0.0008	0.000927362	0.000812404	0.00102956	0.00102956	0.001	0.000860233	0.000812404	0.00114018	0.00148324	0.0013784	0.00116619	0.0013784	0.00172047	0.00202485	0.00237908	0.00276767	0.00278568	0.00347851	0.00356371	0.00463249	0.0049558	0.00517107	0.005004	0.00498598	0.00599166	0.00715821	0.00720694	0.00690652	0.0069814	0.00739189	0.00805233	0.00808084	0.0101371	0.00960521	0.00958436	0.0092228	0.00920543
C	1		C
C	2	Strep 1	C	-0.005	-0.002	-0.003	-0.0005	-0.002	0.001	0.002	0.001	0.005	0.006	0.008	0.011	0.013	0.016	0.02	0.023	0.027	0.033	0.039	0.046	0.055	0.066	0.078	0.092	0.11	0.133	0.154	0.177	0.191	0.218	0.248	0.273	0.286	0.305	0.326	0.352	0.374	0.395	0.417	0.436	0.457	0.481	0.504	0.521	0.534	0.544
C	3	Strep 2	C	-0.003	-0.004	-0.003	-0.002	-0.003	-0.0007	-0.0008	0.001	0.002	0.005	0.008	0.009	0.012	0.016	0.019	0.022	0.028	0.033	0.039	0.045	0.055	0.064	0.076	0.092	0.109	0.131	0.154	0.177	0.192	0.219	0.246	0.269	0.285	0.305	0.327	0.35	0.373	0.393	0.418	0.438	0.458	0.479	0.503	0.522	0.537	0.547
C	4	Strep 3	C	0.003	0.002	0.003	0.004	0.003	0.005	0.005	0.006	0.007	0.009	0.012	0.015	0.018	0.022	0.026	0.028	0.036	0.038	0.047	0.053	0.063	0.073	0.086	0.101	0.119	0.143	0.167	0.188	0.203	0.23	0.258	0.273	0.29	0.311	0.334	0.357	0.382	0.4	0.423	0.444	0.463	0.487	0.509	0.525	0.54	0.553
C	5	Strep 4	C	0.002	0.003	0.005	0.003	0.005	0.005	0.008	0.01	0.011	0.015	0.02	0.022	0.027	0.029	0.035	0.041	0.048	0.056	0.068	0.081	0.095	0.109	0.132	0.155	0.181	0.196	0.215	0.243	0.264	0.28	0.298	0.323	0.347	0.371	0.39	0.415	0.437	0.46	0.478	0.497	0.515	0.53	0.542	0.554	0.57	0.582
C	6	Strep 5	C	0.005	0.004	0.004	0.005	0.007	0.008	0.009	0.011	0.013	0.014	0.019	0.021	0.025	0.026	0.032	0.037	0.041	0.048	0.058	0.067	0.078	0.089	0.107	0.125	0.147	0.17	0.187	0.202	0.229	0.255	0.268	0.289	0.311	0.334	0.356	0.381	0.401	0.426	0.448	0.468	0.485	0.507	0.521	0.536	0.546	0.559
		Strep Average		0.0004	0.0006	0.0012	0.0019	0.002	0.00366	0.00464	0.0058	0.0076	0.0098	0.0134	0.0156	0.019	0.0218	0.0264	0.0302	0.036	0.0416	0.0502	0.0584	0.0692	0.0802	0.0958	0.113	0.1332	0.1546	0.1754	0.1974	0.2158	0.2404	0.2636	0.2854	0.3038	0.3252	0.3466	0.371	0.3934	0.4148	0.4368	0.4566	0.4756	0.4968	0.5158	0.5316	0.5454	0.557
		SEM		0.0018868	0.00153623	0.00174356	0.00134536	0.00194936	0.00155743	0.00183019	0.00213073	0.00198997	0.0020347	0.0026	0.0026	0.00304959	0.00261534	0.00317175	0.00378682	0.00396232	0.00452327	0.00565155	0.00688186	0.00769675	0.00843445	0.0105849	0.012112	0.0137855	0.0124684	0.0115957	0.0122906	0.0138615	0.0119357	0.00945304	0.010008	0.0117873	0.0126349	0.0121227	0.0123167	0.0120025	0.012757	0.0117448	0.0116	0.0110797	0.00966644	0.00728972	0.00620161	0.0064622	0.00676018
D	1		D
D	2	Strep + K 1	D	0.007	0.008	0.007	0.008	0.009	0.008	0.008	0.009	0.011	0.01	0.013	0.012	0.013	0.014	0.015	0.017	0.018	0.019	0.019	0.021	0.024	0.023	0.022	0.025	0.026	0.027	0.029	0.03	0.033	0.035	0.039	0.038	0.041	0.045	0.047	0.05	0.054	0.06	0.063	0.066	0.074	0.078	0.084	0.092	0.102	0.104
D	3	Strep + K 2	D	0.004	0.005	0.003	0.006	0.005	0.004	0.005	0.008	0.007	0.008	0.01	0.012	0.01	0.012	0.012	0.014	0.014	0.016	0.016	0.018	0.02	0.02	0.02	0.023	0.023	0.026	0.026	0.028	0.028	0.032	0.035	0.035	0.035	0.04	0.041	0.047	0.049	0.053	0.056	0.06	0.067	0.072	0.077	0.082	0.088	0.094
D	4	Strep + K 3	D	0.005	0.006	0.003	0.006	0.008	0.004	0.005	0.006	0.008	0.009	0.009	0.012	0.011	0.012	0.013	0.015	0.016	0.015	0.016	0.02	0.021	0.02	0.018	0.02	0.023	0.024	0.026	0.027	0.027	0.032	0.034	0.034	0.035	0.039	0.042	0.045	0.049	0.052	0.055	0.058	0.064	0.068	0.074	0.08	0.086	0.091
D	5	Strep + K 4	D	0.004	0.006	0.006	0.005	0.006	0.007	0.006	0.009	0.009	0.011	0.012	0.011	0.014	0.016	0.015	0.016	0.016	0.018	0.019	0.021	0.021	0.022	0.022	0.023	0.024	0.023	0.025	0.026	0.027	0.026	0.028	0.029	0.029	0.031	0.033	0.032	0.034	0.036	0.036	0.037	0.038	0.039	0.044	0.044	0.045	0.047
D	6	Strep + K 5	D	0.011	0.01	0.012	0.01	0.011	0.011	0.012	0.014	0.014	0.017	0.017	0.017	0.02	0.021	0.022	0.02	0.022	0.022	0.024	0.027	0.026	0.029	0.027	0.03	0.031	0.032	0.033	0.035	0.037	0.035	0.037	0.039	0.041	0.042	0.044	0.044	0.046	0.048	0.05	0.052	0.053	0.06	0.062	0.062	0.067	0.068
		Strep + K Average		0.0062	0.007	0.0062	0.007	0.0078	0.0068	0.0072	0.0092	0.0098	0.011	0.0122	0.0128	0.0136	0.015	0.0154	0.0164	0.0172	0.018	0.0188	0.0214	0.0224	0.0228	0.0218	0.0242	0.0254	0.0264	0.0278	0.0292	0.0304	0.032	0.0346	0.035	0.0362	0.0394	0.0414	0.0436	0.0464	0.0498	0.052	0.0546	0.0592	0.0634	0.0682	0.072	0.0776	0.0808
		SEM		0.00131909	0.000894427	0.00165529	0.000894427	0.00106771	0.00131909	0.00131909	0.00131909	0.00124097	0.00158114	0.00139284	0.00106771	0.00174929	0.00167332	0.00174929	0.00102956	0.00135647	0.00122474	0.00146287	0.00150333	0.0011225	0.00165529	0.00149666	0.00165529	0.00150333	0.00156844	0.00146287	0.00159374	0.00198997	0.00164317	0.00186011	0.00176068	0.00224499	0.00233666	0.00233666	0.00307571	0.00335559	0.00395474	0.00450555	0.00493559	0.00628808	0.00676461	0.00701712	0.00850882	0.00987218	0.0103024
[truncated: 115 more columns]

## Sheet: AH211 Raw Data
Well Row	Well Col	Content	Group	Raw Data (A-595)	Raw Data (A-595)	Raw Data (A-595)	Raw Data (A-595)	Raw Data (A-595)	Raw Data (A-595)	Raw Data (A-595)	Raw Data (A-595)	Raw Data (A-595)	Raw Data (A-595)	Raw Data (A-595)	Raw Data (A-595)	Raw Data (A-595)	Raw Data (A-595)	Raw Data (A-595)	Raw Data (A-595)	Raw Data (A-595)	Raw Data (A-595)	Raw Data (A-595)	Raw Data (A-595)	Raw Data (A-595)	Raw Data (A-595)	Raw Data (A-595)	Raw Data (A-595)	Raw Data (A-595)	Raw Data (A-595)	Raw Data (A-595)	Raw Data (A-595)	Raw Data (A-595)	Raw Data (A-595)	Raw Data (A-595)	Raw Data (A-595)	Raw Data (A-595)	Raw Data (A-595)	Raw Data (A-595)	Raw Data (A-595)	Raw Data (A-595)	Raw Data (A-595)	Raw Data (A-595)	Raw Data (A-595)	Raw Data (A-595)	Raw Data (A-595)	Raw Data (A-595)	Raw Data (A-595)	Raw Data (A-595)	Raw Data (A-595)
		Time		0 h	0 h 6 min	0 h 12 min	0 h 18 min	0 h 24 min	0 h 30 min	0 h 36 min	0 h 42 min	0 h 48 min	0 h 54 min	1 h	1 h 6 min	1 h 12 min	1 h 18 min	1 h 24 min	1 h 30 min	1 h 36 min	1 h 42 min	1 h 48 min	1 h 54 min	2 h	2 h 6 min	2 h 12 min	2 h 18 min	2 h 24 min	2 h 30 min	2 h 36 min	2 h 42 min	2 h 48 min	2 h 54 min	3 h	3 h 6 min	3 h 12 min	3 h 18 min	3 h 24 min	3 h 30 min	3 h 36 min	3 h 42 min	3 h 48 min	3 h 54 min	4 h	4 h 6 min	4 h 12 min	4 h 18 min	4 h 24 min	4 h 30 min
A	1	Blank B	A	0.207	0.202	0.199	0.198	0.198	0.2	0.197	0.197	0.196	0.196	0.196	0.196	0.196	0.198	0.196	0.194	0.196	0.195	0.195	0.195	0.197	0.195	0.194	0.195	0.195	0.195	0.196	0.195	0.195	0.194	0.197	0.195	0.193	0.195	0.195	0.196	0.195	0.193	0.195	0.195	0.195	0.194	0.194	0.193	0.194	0.194
A	2	LB 1	A	0.214	0.208	0.205	0.202	0.203	0.204	0.205	0.206	0.206	0.211	0.216	0.218	0.22	0.226	0.23	0.236	0.245	0.253	0.264	0.275	0.291	0.309	0.33	0.355	0.38	0.394	0.419	0.451	0.476	0.491	0.51	0.53	0.554	0.578	0.598	0.619	0.639	0.659	0.681	0.706	0.726	0.737	0.748	0.758	0.774	0.789
A	3	LB 2	A	0.211	0.204	0.203	0.202	0.203	0.204	0.203	0.204	0.207	0.21	0.215	0.217	0.22	0.228	0.233	0.238	0.248	0.257	0.268	0.283	0.302	0.321	0.345	0.37	0.389	0.407	0.438	0.467	0.482	0.498	0.521	0.543	0.566	0.588	0.61	0.631	0.65	0.671	0.697	0.717	0.732	0.744	0.753	0.771	0.784	0.797
A	4	LB 3	A	0.212	0.208	0.206	0.204	0.204	0.207	0.207	0.208	0.209	0.214	0.217	0.219	0.223	0.229	0.233	0.239	0.25	0.259	0.271	0.284	0.304	0.321	0.345	0.371	0.387	0.405	0.435	0.459	0.474	0.492	0.513	0.535	0.557	0.579	0.6	0.619	0.64	0.658	0.684	0.703	0.716	0.73	0.741	0.756	0.77	0.781
		Blank B		0.211	0.204	0.202	0.201	0.2	0.198	0.2	0.199	0.199	0.197	0.197	0.197	0.195	0.196	0.196	0.195	0.195	0.196	0.195	0.194	0.196	0.195	0.196	0.194	0.194	0.195	0.194	0.193	0.194	0.194	0.194	0.193	0.194	0.192	0.194	0.194	0.194	0.195	0.192	0.194	0.193	0.192	0.192	0.193	0.192	0.193
A	5	LB 4	A	0.212	0.206	0.205	0.204	0.204	0.204	0.207	0.208	0.21	0.213	0.218	0.222	0.227	0.233	0.239	0.249	0.26	0.273	0.286	0.304	0.325	0.348	0.375	0.394	0.409	0.438	0.462	0.476	0.498	0.521	0.546	0.568	0.591	0.612	0.638	0.658	0.678	0.695	0.715	0.732	0.746	0.762	0.775	0.787	0.797	0.81
A	6	LB 5	A	0.218	0.211	0.208	0.207	0.207	0.204	0.209	0.209	0.212	0.213	0.218	0.221	0.224	0.23	0.236	0.243	0.251	0.262	0.276	0.288	0.306	0.326	0.349	0.373	0.391	0.41	0.437	0.461	0.478	0.496	0.521	0.544	0.568	0.588	0.612	0.636	0.658	0.678	0.694	0.715	0.733	0.745	0.761	0.775	0.787	0.799
B	1	Blank B	B	0.208	0.202	0.201	0.199	0.195	0.198	0.197	0.195	0.196	0.197	0.197	0.196	0.195	0.195	0.196	0.195	0.196	0.195	0.195	0.195	0.196	0.195	0.194	0.194	0.195	0.195	0.195	0.196	0.195	0.195	0.196	0.194	0.194	0.195	0.195	0.195	0.195	0.195	0.194	0.194	0.195	0.194	0.193	0.193	0.194	0.194
B	2	Kamba 1	B	0.209	0.203	0.203	0.201	0.198	0.201	0.201	0.202	0.202	0.204	0.206	0.207	0.207	0.211	0.213	0.215	0.219	0.219	0.223	0.227	0.233	0.235	0.24	0.246	0.253	0.261	0.269	0.28	0.291	0.302	0.315	0.329	0.339	0.354	0.365	0.38	0.396	0.411	0.426	0.438	0.452	0.462	0.478	0.494	0.509	0.523
B	3	Kamba 2	B	0.21	0.204	0.202	0.201	0.2	0.201	0.202	0.203	0.204	0.207	0.208	0.21	0.211	0.214	0.215	0.219	0.223	0.226	0.229	0.233	0.241	0.245	0.251	0.259	0.269	0.277	0.289	0.301	0.317	0.332	0.345	0.356	0.368	0.387	0.404	0.418	0.432	0.445	0.458	0.472	0.488	0.506	0.52	0.535	0.549	0.562
B	4	Kamba 3	B	0.209	0.203	0.202	0.2	0.2	0.2	0.2	0.201	0.202	0.205	0.207	0.207	0.208	0.213	0.215	0.215	0.219	0.224	0.227	0.229	0.236	0.24	0.246	0.252	0.261	0.267	0.28	0.288	0.302	0.316	0.33	0.342	0.352	0.367	0.383	0.398	0.414	0.427	0.441	0.453	0.465	0.481	0.495	0.512	0.527	0.545
		Blank B		0.204	0.198	0.197	0.197	0.195	0.193	0.194	0.193	0.195	0.194	0.194	0.194	0.194	0.192	0.193	0.194	0.194	0.193	0.194	0.194	0.194	0.194	0.192	0.192	0.194	0.194	0.192	0.193	0.194	0.193	0.193	0.194	0.193	0.193	0.194	0.193	0.193	0.194	0.192	0.194	0.19	0.193	0.192	0.192	0.192	0.193
B	5	Kamba 4	B	0.208	0.202	0.202	0.201	0.2	0.2	0.202	0.202	0.205	0.205	0.207	0.209	0.211	0.214	0.215	0.218	0.222	0.225	0.229	0.232	0.237	0.241	0.248	0.254	0.262	0.271	0.28	0.291	0.302	0.315	0.328	0.338	0.349	0.36	0.374	0.386	0.398	0.41	0.419	0.432	0.441	0.455	0.47	0.484	0.5	0.514
B	6	Kamba 5	B	0.212	0.204	0.203	0.201	0.201	0.2	0.203	0.203	0.203	0.205	0.207	0.209	0.21	0.212	0.213	0.217	0.219	0.221	0.224	0.229	0.234	0.238	0.242	0.249	0.256	0.264	0.272	0.282	0.292	0.306	0.317	0.33	0.342	0.352	0.366	0.379	0.394	0.407	0.417	0.429	0.441	0.453	0.468	0.482	0.497	0.515
C	1	Blank B	C	0.212	0.207	0.206	0.202	0.203	0.202	0.202	0.201	0.201	0.202	0.201	0.201	0.199	0.201	0.2	0.2	0.2	0.2	0.199	0.199	0.2	0.199	0.2	0.2	0.199	0.198	0.199	0.199	0.2	0.199	0.2	0.199	0.199	0.199	0.2	0.199	0.199	0.201	0.198	0.199	0.199	0.198	0.197	0.198	0.198	0.198
C	2	Strep 1	C	0.208	0.206	0.203	0.202	0.201	0.203	0.204	0.202	0.205	0.207	0.209	0.212	0.212	0.217	0.219	0.223	0.228	0.233	0.238	0.246	0.255	0.265	0.278	0.291	0.309	0.332	0.353	0.376	0.391	0.417	0.448	0.472	0.485	0.505	0.525	0.551	0.573	0.596	0.615	0.635	0.656	0.679	0.701	0.719	0.732	0.743
C	3	Strep 2	C	0.209	0.204	0.203	0.201	0.199	0.201	0.201	0.202	0.202	0.207	0.208	0.21	0.211	0.217	0.219	0.222	0.229	0.232	0.238	0.244	0.255	0.264	0.276	0.292	0.308	0.329	0.353	0.376	0.392	0.417	0.445	0.468	0.483	0.505	0.526	0.549	0.572	0.594	0.616	0.636	0.657	0.677	0.7	0.72	0.735	0.745
C	4	Strep 3	C	0.215	0.209	0.208	0.207	0.205	0.206	0.207	0.207	0.207	0.21	0.213	0.216	0.218	0.223	0.226	0.228	0.236	0.238	0.245	0.253	0.263	0.272	0.286	0.301	0.318	0.341	0.366	0.387	0.402	0.429	0.458	0.472	0.489	0.51	0.533	0.556	0.58	0.601	0.621	0.642	0.661	0.685	0.706	0.723	0.737	0.751
		Blank B		0.213	0.206	0.203	0.204	0.202	0.2	0.201	0.2	0.201	0.199	0.198	0.2	0.198	0.2	0.198	0.199	0.199	0.199	0.2	0.199	0.199	0.2	0.198	0.198	0.197	0.198	0.197	0.197	0.197	0.197	0.199	0.197	0.198	0.196	0.198	0.197	0.199	0.198	0.197	0.198	0.197	0.196	0.197	0.197	0.198	0.198
C	5	Strep 4	C	0.215	0.208	0.208	0.207	0.206	0.205	0.208	0.21	0.212	0.214	0.218	0.222	0.225	0.229	0.233	0.239	0.248	0.256	0.267	0.279	0.294	0.309	0.33	0.353	0.378	0.394	0.413	0.44	0.461	0.477	0.497	0.52	0.545	0.568	0.589	0.611	0.636	0.658	0.676	0.695	0.712	0.726	0.739	0.751	0.768	0.78
C	6	Strep 5	C	0.218	0.209	0.207	0.209	0.209	0.208	0.209	0.211	0.214	0.213	0.216	0.221	0.223	0.226	0.23	0.236	0.241	0.247	0.257	0.265	0.277	0.289	0.305	0.324	0.344	0.368	0.385	0.4	0.426	0.452	0.467	0.486	0.509	0.53	0.554	0.578	0.6	0.624	0.645	0.666	0.682	0.704	0.718	0.733	0.744	0.757
D	1	Blank B	D	0.203	0.198	0.197	0.194	0.192	0.194	0.194	0.192	0.192	0.193	0.193	0.192	0.191	0.193	0.192	0.191	0.192	0.192	0.191	0.19	0.191	0.191	0.192	0.192	0.192	0.19	0.191	0.192	0.193	0.191	0.19	0.192	0.192	0.191	0.192	0.191	0.191	0.19	0.19	0.191	0.191	0.191	0.191	0.19	0.191	0.192
D	2	Strep + K 1	D	0.209	0.206	0.203	0.201	0.2	0.202	0.202	0.202	0.203	0.203	0.205	0.205	0.204	0.208	0.207	0.208	0.211	0.211	0.211	0.21	0.215	0.213	0.214	0.216	0.217	0.218	0.22	0.223	0.226	0.226	0.229	0.23	0.233	0.236	0.239	0.241	0.245	0.249	0.253	0.258	0.264	0.269	0.275	0.281	0.293	0.295
D	3	Strep + K 2	D	0.207	0.203	0.2	0.2	0.197	0.199	0.199	0.2	0.199	0.201	0.203	0.204	0.201	0.205	0.204	0.205	0.206	0.207	0.208	0.208	0.211	0.211	0.212	0.215	0.214	0.216	0.217	0.22	0.222	0.223	0.225	0.227	0.227	0.231	0.234	0.238	0.24	0.243	0.247	0.251	0.258	0.263	0.267	0.272	0.279	0.286
D	4	Strep + K 3	D	0.208	0.203	0.2	0.2	0.199	0.198	0.199	0.199	0.2	0.201	0.202	0.204	0.203	0.205	0.205	0.205	0.209	0.207	0.208	0.21	0.211	0.21	0.21	0.212	0.215	0.215	0.217	0.22	0.22	0.222	0.224	0.226	0.227	0.23	0.234	0.236	0.24	0.242	0.245	0.249	0.255	0.259	0.265	0.269	0.277	0.283
		Blank B		0.202	0.194	0.193	0.194	0.193	0.191	0.193	0.191	0.193	0.191	0.191	0.193	0.191	0.19	0.19	0.192	0.192	0.191	0.19	0.189	0.19	0.189	0.191	0.191	0.19	0.191	0.19	0.19	0.19	0.191	0.191	0.19	0.191	0.189	0.189	0.191	0.191	0.191	0.19	0.191	0.191	0.189	0.189	0.19	0.189	0.19
D	5	Strep + K 4	D	0.206	0.2	0.199	0.199	0.199	0.199	0.2	0.201	0.202	0.202	0.203	0.204	0.205	0.206	0.205	0.208	0.208	0.209	0.21	0.209	0.211	0.211	0.213	0.214	0.214	0.215	0.214	0.215	0.217	0.216	0.219	0.219	0.22	0.22	0.222	0.223	0.225	0.226	0.226	0.228	0.229	0.228	0.233	0.234	0.234	0.237
D	6	Strep + K 5	D	0.213	0.205	0.205	0.204	0.203	0.203	0.205	0.205	0.207	0.208	0.208	0.21	0.211	0.211	0.212	0.212	0.213	0.213	0.215	0.216	0.216	0.218	0.219	0.221	0.221	0.223	0.222	0.225	0.226	0.226	0.228	0.229	0.232	0.231	0.233	0.235	0.237	0.239	0.241	0.243	0.243	0.248	0.251	0.253	0.257	0.258
[truncated: 115 more columns]
